1 **Title**

2 ***Arabidopsis thaliana* rosette growth habit is a photomorphogenic trait controlled by the**  
3 **TALE homeodomain protein ATH1 and involves TOR kinase**

4  
5 **Authors**

6 Shahram Shokrian Hajibehzad<sup>1</sup>, Savani S. Silva<sup>1</sup>, Niels Peeters<sup>1</sup>, Evelien Stouten<sup>1</sup>, Guido Buijs<sup>1</sup>,  
7 Sjef Smekens<sup>1</sup>, and Marcel Proveniers<sup>1\*</sup>

8  
9 **Affiliations**

10 <sup>1</sup>Molecular Plant Physiology, Department of Biology, Science4Life, Utrecht University,  
11 Padualaan 8, Utrecht, 3584 CH, The Netherlands.

12 \* Correspondence: Marcel Proveniers, [m.proveniers@uu.nl](mailto:m.proveniers@uu.nl)

13  
14 **Contact**

15 Marcel Proveniers, [m.proveniers@uu.nl](mailto:m.proveniers@uu.nl)

16  
17 **Running title**

18 **Rosette habit is a photomorphogenic trait controlled by ATH1**

19  
20 **Abstract**

21 Here, we demonstrate that *Arabidopsis* rosette habit is a *bona fide* photomorphogenic trait  
22 controlled by the homeodomain protein ATH1. In light, *ATH1* expression at the SAM is induced  
23 by broad wavelengths, mediated through multiple photoreceptors, and requires inactivation of  
24 COP1 and PIF photomorphogenesis inhibitors. Such induced *ATH1* prevents elongation of rosette  
25 internodes by maintaining the rib zone area of the SAM in an inactive state. In the absence of light,  
26 *Arabidopsis* plants cannot complete seedling establishment after germination due to inactivity of  
27 the shoot apical meristem (SAM). Light requirement for SAM activation can be overcome by  
28 availability to the meristem of metabolizable sugars, such as sucrose. However, under these  
29 conditions plants fail to establish a typical compact rosette and display a caulescent growth habit.  
30 We show that this is due to insufficient expression of *ATH1* at the SAM. ATH1 induction restores  
31 rosette habit in dark-grown plants through inhibition of *PIF* gene expression. Together, this

32 suggests that a SAM-specific, double-negative ATH1-PIF feedback loop is at the basis of  
33 Arabidopsis rosette habit. Induction of *ATH1* expression and restoration of rosette habit in  
34 darkness also occurs at increased levels of sucrose. Both sugar and light signals that induce *ATH1*  
35 are mediated by TOR kinase. Overall, these results support a fundamental role for ATH1 in  
36 Arabidopsis rosette habit and further strengthen a role for TOR kinase as a central hub for  
37 integration of energy and light signals controlling organogenesis at the SAM.

38  
39 Key words: *ARABIDOPSIS THALIANA* HOMEBOX 1 (ATH1), rosette growth habit,  
40 photomorphogenesis, TOR kinase, meristem activity

41

## 42 **Introduction**

43 Plants, as sessile organisms, are equipped with sophisticated mechanisms to sense the environment  
44 and to adapt their growth and development accordingly. Being photoautotrophs, plants are  
45 especially attuned to the light environment. This is well illustrated by the dramatic differences in  
46 appearance between light- and dark-grown seedlings. In Arabidopsis, dark-grown seedlings have  
47 a typical etiolated phenotype, characterized by an elongated hypocotyl, formation of an apical  
48 hook, closed and unexpanded cotyledons, and an arrested shoot apical meristem (SAM). Exposure  
49 of seedlings to light results in inhibition of hypocotyl elongation, opening of the apical hook,  
50 opening and expansion of cotyledons, and SAM activation (Chen and Chory, 2011; Arsovski et  
51 al., 2012; Pfeiffer et al., 2016; Mohammed et al., 2017; Janocha et al., 2021). The active SAM  
52 gives rise to the aerial portion of the plant via the formation of organ primordia at its flanks. During  
53 the vegetative growth phase, leaf primordia arise in a spiral phyllotaxy to form a compact, basal  
54 rosette in which internode elongation remains arrested. In the absence of light, SAM activity can  
55 be induced by exposing the SAM to metabolizable sugar, such as sucrose, glucose, or fructose  
56 (Araki and Komeda, 1993; Roldán et al., 1999). Both light- and sugar-mediated SAM activation  
57 involve TARGET OF RAPAMYCIN (TOR) kinase, a central component in energy sensing, such  
58 that it promotes SAM activity in favorable conditions (Pfeiffer et al., 2016; Li et al., 2017;  
59 Mohammed et al., 2017; Janocha et al., 2021). It has been proposed that light, via photoreceptor  
60 signaling through CONSTITUTIVE PHOTOMORPHOGENIC1 (COP1), plays a permissive role  
61 toward energy signaling in the SAM, possibly by controlling sugar import into the meristem

62 (Mohammed et al., 2017). This might explain why direct access of the SAM to metabolizable sugar  
63 can activate the meristem in the absence of light.

64 Sugar-induced dark morphogenesis of Arabidopsis plants follows the same developmental phases  
65 as light-grown plants. However, in sugar-induced, dark-grown plants stem elongation is not  
66 inhibited during vegetative development contrary to light-grown plants. Consequently, such dark-  
67 grown plants no longer display a rosette habit and elongated internodes are present between  
68 adjacent ‘rosette’ leaves (Roldán et al., 1999; Mohammed et al., 2017). A similar loss of rosette  
69 habit has been observed in light-grown Arabidopsis plants lacking functional phytochrome (phy)  
70 and/or cryptochrome (CRY) photoreceptors. Control of rosette internode elongation in response  
71 to a low red to far-red (R:FR) ratio of light or end-of-day FR light (EOD-FR) is mediated by phyA,  
72 phyB, phyD, and phyE in a functionally redundant manner (Devlin et al., 1996; Whitelam and  
73 Devlin, 1997; Devlin et al., 1998; Whitelam et al., 1998; Devlin et al., 1999; Roldán et al., 1999;  
74 Mazzella et al., 2000; Devlin et al., 2003; Franklin et al., 2003a). In addition, ambient temperature  
75 has been reported to modulate the light-regulation of Arabidopsis rosette habit. At elevated  
76 ambient temperature, phyB and CRY1 redundantly suppress internode elongation during  
77 vegetative development (Mazzella et al., 2000). A compact rosette habit thus is a *bona fide*  
78 photomorphogenic trait in Arabidopsis. However, despite numerous observations and the  
79 economic importance of rosette habit in vegetable crops, this aspect of photomorphogenic  
80 development has been paid little attention and molecular events involved downstream of  
81 photoreceptor signaling remain to be identified.

82 In Arabidopsis, internode elongation reflects the activity of the basal part of the SAM, the rib zone.  
83 In light-grown plants, the rib zone is compact and mitotically inactive during vegetative growth,  
84 resulting in the formation of a compact rosette. At floral transition, the rib zone becomes activated  
85 to provide cells for rapid elongation of the internodes of the inflorescence stem (Vaughan, 1955;  
86 Sachs et al., 1959; Peterson and Yeung, 1972; Jacqumard et al., 2003; Bencivenga et al., 2016;  
87 Serrano-Mislata et al., 2017). Previously, ectopic expression of the Three-Amino Acid Loop  
88 Extension (TALE) homeobox gene *ARABIDOPSIS THALIANA HOMEBOX GENE1 (ATH1)*  
89 was shown to suppress growth of the inflorescence stem, due primarily to inhibition of internode  
90 elongation (Cole et al., 2006; Gómez-Mena and Sablowski, 2008; Rutjens et al., 2009; Ejaz et al.,  
91 2021). In wild-type plants, *ATH1* is expressed in the vegetative SAM, and its expression in this  
92 tissue is rapidly downregulated at floral transition, when stem growth is initiated. In addition, in

93 plants lacking functional *ATH1*, the subapical region, where the rib zone is located, is enlarged  
94 during vegetative development, suggesting that *ATH1* restricts growth of this part of the SAM  
95 (Proveniers et al., 2007; Gómez-Mena and Sablowski, 2008). In line with this, light-grown *ath1*  
96 mutants display slightly elongated rosette internodes, resembling those of higher-order  
97 photoreceptor mutants (Li et al., 2012; Ejaz et al., 2021). *ATH1* was originally identified in a screen  
98 for light-regulated transcription factor genes and its expression is induced by light during seedling  
99 de-etiolation (Quaedvlieg et al., 1995). In dark-grown seedlings of the photomorphogenic *cop1*  
100 mutant *ATH1* mRNA levels are elevated as well, suggesting that *ATH1* expression is under the  
101 control of COP1, a negative regulator of photomorphogenesis (Quaedvlieg et al., 1995; Proveniers  
102 et al., 2007). In line with this, *cop1* loss-of-function mutants exhibit a constitutive deetiolated  
103 phenotype in darkness, including formation of a compact rosette (Deng and Quail, 1992). Together  
104 with SUPPRESSOR OF PHYA-105 (SPA) proteins, COP1 forms an E3 ubiquitin ligase complex,  
105 which acts by regulating the stability of photomorphogenesis-promoting transcription factors. In  
106 addition, COP1/SPA stabilizes proteins of the PHYTOCHROME INTERACTING FACTOR  
107 (PIF) family in darkness to promote etiolation (Ponnu and Hoecker, 2021)). Upon exposure to  
108 light, phytochromes physically interact with PIF proteins and promote their turnover, resulting in  
109 de-etiolation (Pham et al., 2018a; Ponnu and Hoecker, 2021).

110 Here we show that *ATH1* confers rosette habit in light-grown, vegetative *Arabidopsis* plants by  
111 integration of signals from multiple photoreceptors. In wildtype plants, *ATH1* expression can be  
112 induced by blue, red, and far-red light and this requires both the PHY and CRY families of  
113 photoreceptors. Dark-grown wildtype plants and higher-order photoreceptor mutants display  
114 strongly reduced levels of *ATH1* in the SAM and transgene expression of *ATH1* is sufficient to  
115 restore rosette habit in both cases. Finally, we introduce a regulatory feedback loop whereby  
116 multiple PIFs (i.e., PIF1, PIF3, PIF4, and PIF5) and *ATH1* repress each other's expression in a  
117 tissue-specific manner, contributing to the maintenance of rosette habit.

118 Furthermore, in the absence of light, *ATH1* expression can be induced by the direct availability of  
119 metabolic sugars to the SAM. We show that increasing amounts of sucrose result in a  
120 corresponding increase of *ATH1* expression and associated increased inhibition of vegetative  
121 internode elongation. Our data further show that both light- and metabolic signal-mediated  
122 induction of *ATH1* at the SAM requires activation of TOR kinase.

123

124 **Results**

125 **Induction of *ATH1* expression restores a compact rosette habit in dark-grown seedlings**

126 In higher plants, most of the above-ground part is generated by a combination of cell division, cell  
127 growth, cell expansion, morphogenesis, and differentiation at or near the SAM. Upon germination,  
128 the SAM becomes rapidly activated by light and starts a highly coordinated cell division program  
129 that continues throughout vegetative growth. In contrast, stem cells remain dormant when  
130 Arabidopsis plants are germinated and grown in darkness (Pfeiffer et al., 2016; Mohammed et al.,  
131 2017) As a result, dark-grown seedlings display a typical etiolated phenotype. This morphogenetic  
132 arrest can be overcome by the availability of sucrose to the aerial part of the plant. Sugar-induced  
133 dark morphogenesis of Arabidopsis plants follows the same developmental phases as light-grown  
134 plants. However, such plants fail to develop a compact rosette (Figure 1A, B) (Roldán et al., 1999;  
135 Mohammed et al., 2017).

136 The compact rosette habit of light-grown Arabidopsis plants is conferred by *ATH1* (Li et al., 2012;  
137 Ejaz et al., 2021). We tested whether *ATH1* expression is sufficient for development of a compact  
138 rosette in dark-grown plants. For this a fusion protein of *ATH1* with the rat glucocorticoid receptor  
139 hormone-binding domain (HBD) under the control of the CaMV 35S promoter (*35Spro:ATH1-  
140 HBD*; Rutjens et al., 2009) was expressed in plants grown in continuous darkness in the presence  
141 of one percent sucrose (Figure 1A, B). Induction of nuclear expression of *ATH1* using  
142 dexamethasone (Dex) resulted in strong repression of rosette internode elongation and,  
143 consequently, restoration of rosette habit in dark-grown plants, while Col-8 control plants and  
144 mock-treated *35Spro:ATH1-HBD* plants displayed elongated vegetative internodes, resulting in  
145 loss of rosette habit (Figure 1A, B). Surprisingly, in darkness in the presence of sucrose vegetative  
146 internodes of loss-of-function *ath1* mutants (Proveniers et al., 2007), were slightly more elongated  
147 than those in Col-8 wild-type control plants (Figure 1A, B), suggesting that *ATH1* might still be  
148 expressed to some extent in the absence of light, despite previous research indicating the absence  
149 of *ATH1* expression in dark-grown plants (Quaedvlieg et al., 1995).

150 Possibly, the addition of one percent sucrose to the growth medium, necessary to induce dark  
151 morphogenesis, results in induction of *ATH1* gene expression in the absence of light. To  
152 investigate whether *ATH1* is expressed in dark-grown seedlings in the presence of sucrose, we  
153 compared *ATH1* expression between light- and dark-grown seedlings, both supplied with one  
154 percent exogenous sucrose. As can be seen in Figure 1C, *ATH1* expression is significantly

155 decreased but not entirely abolished in dark-grown seedlings. Compared to a light-grown situation,  
156 *ATH1* expression is more than 80% reduced (Figure 1D). Furthermore, in accordance with  
157 Quaedvlieg *et al.* (1995), *ATH1pro:GUS* analysis showed no *ATH1* induction in dark-grown  
158 plants in absence of sucrose, whereas *ATH1* promoter activity could be gradually induced by  
159 addition of increasing amounts of sucrose to the growth medium (Figure 1E). These findings  
160 indicate a dose-dependent relationship between sucrose concentration and *ATH1* expression in  
161 dark-grown plants. Thus, in dark-grown *Arabidopsis* plants, sucrose can substitute for light to  
162 induce *ATH1* expression at the shoot apex.

163 Importantly, these observations suggest a close correlation between the amount of *ATH1* expressed  
164 at the shoot apex and the extent to which rosette internode elongation is suppressed. To test this,  
165 we analyzed elongation of vegetative internodes in dark-grown *35Spro:ATH1-HBD* plants  
166 exposed to increasing concentrations of Dex (Figure 1F). As Dex promotes nuclear accumulation  
167 of *ATH1*, increased Dex concentrations are expected to result in increased levels of nuclear *ATH1*  
168 and, hence, stronger inhibition of internode elongation. This is exactly what was observed, with a  
169 maximum inhibitory effect on internode elongation in plants exposed to a Dex concentration of  
170 100 nM, whereas none of the Dex concentrations tested had any effect on rosette internode  
171 elongation in control plants (Figure 1F). In line with these results, dark-grown Col-8 plants  
172 displayed increasing inhibition of rosette internode elongation when exposed to increasing  
173 concentrations of sucrose (0.5, 1.0, 1.5, or 2.5%). In these seedlings, rosette habit was completely  
174 restored in the presence of 2.5% sucrose, comparable to fully-induced dark-grown *35Spro:ATH1-*  
175 *HBD* plants (Figure 1A, F, G). As expected, in *ath1-4* mutant plants, internode elongation  
176 remained unaffected at all sucrose concentrations tested (Figure 1G). Taken together, this strongly  
177 suggests that sucrose-induced repression of rosette internode elongation in dark-grown plants is  
178 *ATH1*-dependent. These findings further show that typical loss of rosette habit, generally observed  
179 in sucrose-stimulated, dark-grown *Arabidopsis* plants, can be attributed to suboptimal *ATH1*  
180 expression at the shoot apex.

181  
182 **SAM morphology of sucrose-stimulated, dark-grown seedlings strongly resembles that of**  
183 **light-grown *ath1* mutants**

184 In light-grown *ath1* mutants elongation of vegetative internodes results from activation of stem  
185 development, as reflected by premature rib zone (RZ) activity (Roldán *et al.*, 1999; Rutjens *et al.*,



186 2009; Ejaz et al., 2021). To confirm that the elongated internode phenotype observed in dark-  
187 grown Arabidopsis plants also results from premature activation of stem development, we imaged  
188 shoot apices of both light- and dark-grown Col-8 seedlings and compared these with those of light-  
189 grown *ath1-4* seedlings (Figure 2A-C). We then measured the lengths of individual cells that make  
190 up a central cell file running from the L1 layer into the subapical RZ region of the SAM until  
191 where the hypocotyl vascular strands converge (Figure 2F). As expected, when grown for five  
192 days in continuous light, *ath1-4* mutants displayed elongated vegetative internodes, whereas those  
193 of Col-8 plants remained compact (Figure S2A, C). Comparing the *ath1-4* and Col-8 genotypes  
194 showed the first four cells of the central cell file to be of similar length. In contrast, more basal  
195 cells, in the RZ region, were significantly more elongated in *ath1-4* mutants (Figure 2A, C, F).  
196 This is in line with previous observations by Rutjens et al. (2009) who found that in *ath1* mutants  
197 RZ cells are more longitudinally elongated than in wild-type control plants. A similar SAM  
198 morphology was observed in Col-8 seedlings grown in darkness and supplied with one percent  
199 sucrose. Under these conditions, Col-8 rosette habit is no longer maintained, similar to light-grown  
200 *ath1* mutants, (Figure S2B). Compared to light-grown Col-8 seedlings, basal cells were  
201 significantly more elongated in dark-grown Col-8 seedlings in the presence of sucrose, whereas  
202 the lengths of the four apical central cells of light-grown Col-8 seedlings were not statistically  
203 different compared to dark-grown Col-8 (Figure 2A-C, F). Morphologically these basal cells  
204 resemble the elongated RZ cells of *ath1-4* mutants (Figure 2B, C).

205 Since ectopic expression of *ATH1* restored a compact rosette habit in dark-grown seedlings (Figure  
206 1A, B; S2D, E), we examined whether this is caused by inhibition of RZ activity. While dark-  
207 grown mock-treated *35Spro:ATH1-HBD* plants showed a SAM morphology similar to that of  
208 dark-grown Col-8 control plants, induction of *ATH1* specifically repressed cell elongation in the  
209 basal RZ cells (Figure 2B, D-F). Taken together, these findings indicate that loss of rosette habit  
210 in Arabidopsis plants in the absence of light, results from premature RZ activation due to  
211 significantly reduced *ATH1* expression at the shoot apex. Moreover, we noted that in dark-grown  
212 seedlings the central cell file always contained more cells than that of light grown plants (Figure  
213 2A-F). This seems to be an effect of light independent of *ATH1* as this was found for all genotypes  
214 analyzed.

215

216 **ATH1 functions downstream of multiple photoreceptors to maintain a compact rosette habit**

217 Loss of rosette habit due to elongation of vegetative internodes, reminiscent of the caulescent  
218 growth habit of sucrose-induced, dark-grown *Arabidopsis* plants, can also be observed in light-  
219 grown photoreceptor mutants. Elongation of vegetative internodes is clearly visible in higher order  
220 mutants, such as *phyA phyB* (*phyAB*), *phyA phyB phyD* (*phyABD*), *phyA phyB phyE* (*phyABE*),  
221 *phyB phyD phyE* (*phyBDE*), *phyA phyB phyD phyE* (*phyABDE*) mutants, a quintuple *phy* mutant,  
222 and *phyB cry1* mutants (Devlin et al., 1996; Devlin et al., 1998; Whitelam et al., 1998; Devlin et  
223 al., 1999; Mazzella et al., 2000; Devlin et al., 2003; Strasser et al., 2010; Li et al., 2012). *ATH1*  
224 expression is strongly light-dependent (Quaedvlieg et al., 1995; Roldán et al., 1999; Proveniers et  
225 al., 2007) (Figure 1C, D), raising the question of whether light-mediated expression of *ATH1*  
226 depends on these photoreceptors. If so, it is of interest to investigate whether reduced levels of  
227 *ATH1* can explain the significant elongation of internodes between adjacent rosette leaves  
228 displayed by the respective photoreceptor mutants. To answer these questions, we first grew wild-  
229 type seedlings under different wavelengths of light and analyzed *ATH1* mRNA levels (Figure 3A).  
230 This revealed that apart from white light, as reported before, monochromatic blue, red, and far-red  
231 light induce *ATH1* expression to significant levels, suggesting that *ATH1* is under control of  
232 multiple photoreceptors.

233 We next determined *ATH1* promoter activity and mRNA levels in a series of phytochrome and/or  
234 cryptochrome photoreceptor mutants grown under various light quality conditions (Figure 3C; S1).  
235 Whereas *ATH1* transcript levels in response to white light were somewhat decreased in *phyB* and  
236 *cry1* single mutants, combination of both mutations significantly affected white light-mediated  
237 induction of *ATH1* expression (Figure 3C; S1). Similarly, introduction of additional *phy* mutations  
238 in a *phyB* background or the combination of the phytochrome chromophore biosynthesis mutant  
239 *hy1* with *cry1* and/or *cry2* mutations resulted in moderate to severe reduction in *ATH1* transcript  
240 levels in white light, confirming that light-mediated regulation of *ATH1* is under control of  
241 multiple photoreceptors (Figure 3C, S1A). Repeating experiments under monochromatic red, far-  
242 red, or blue-light conditions revealed that red-light-mediated induction of *ATH1* expression is  
243 mostly the result of phyB function, in cooperation with phyD and phyE (Figure 3C, S1B), whereas  
244 phyA is largely responsible for *ATH1* induction in far-red light (Figure 3C, S1D). Under  
245 monochromatic blue light, CRY1 and CRY2 redundantly contribute to *ATH1* gene activity, with  
246 CRY1 being the predominant cryptochrome under the conditions tested (Figure 3C, S1C). We  
247 further noticed that all photoreceptor mutants previously reported to have a loss of rosette habit,



248 including *phyBDE* and *phyB cry1* mutants (Mazzella et al., 2000; Li et al., 2012), all had severely  
249 reduced levels of *ATH1* (Figure 3C). Internode elongation reflects activity of the basal part of the  
250 SAM, the rib zone, and *ATH1* controls activity of this tissue. We compared the spatial activity of  
251 the *ATH1* promoter in these higher order photoreceptor mutants with that in *Ler* control plants and  
252 a *phyB* mutant. In line with previous observations (Proveniers et al., 2007), high levels of GUS  
253 activity were present in the SAM and emerging leaf primordia of *Ler ATH1pro:GUS* seedlings  
254 grown in white light. Corroborating our qPCR data, GUS activity was significantly reduced in  
255 *phyB cry1 ATH1pro:GUS* and *phyBDE ATH1pro:GUS* plants, whereas in a *phyB* background GUS  
256 activity was only moderately affected (Figure 3B). Interestingly, the largest effect of reduced  
257 photoreceptor signaling on *ATH1* promoter activity was in the SAM region. In both *phyB cry1* and  
258 *phyBDE* backgrounds hardly any residual GUS activity could be detected in the SAM, including  
259 the rib zone area, whereas in leaf primordia a more modest reduction in *GUS* expression was  
260 observed (Figure 3B). Taken together, these findings suggest that phytochrome and cryptochrome  
261 photoreceptor families contribute to rosette growth habit in light-grown vegetative Arabidopsis  
262 plants through induction of *ATH1* expression in the SAM.

263 To further test this hypothesis, we constitutively expressed *ATH1 (Pro35S:HA-ATH1)* in a number  
264 of photoreceptor mutants that display elongation of vegetative internodes when grown under  
265 standard, long-day conditions, with partial to complete loss of rosette growth habit as a result  
266 (Figure 3D, E). Under these growth conditions, *Ler* control plants never display any detectable  
267 elongation of rosette internodes. In contrast, internodes of *phyB*, *phyBcry1*, *hylcry1*, and  
268 *hylcry1cry2* mutants were visibly elongated (Figure 3D, E). Strikingly, the extent to which rosette  
269 internode elongation was affected in these genotypes nicely correlates with earlier observed *ATH1*  
270 expression levels in the respective mutant backgrounds (Figure 3C-E; S1A). As expected,  
271 constitutive expression of *ATH1* completely suppressed elongation of vegetative internodes in all  
272 four mutants analyzed (Figure 3D, E). Thus, reestablishing high levels of *ATH1* expression is  
273 sufficient to restore a compact rosette habit in higher order photoreceptor mutants.

274 In conclusion, rosette growth habit, quintessential for light-grown vegetative Arabidopsis plants,  
275 is imposed by *ATH1* activity in the shoot apex under control of multiple blue and red/far-red light  
276 photoreceptors.

277

278 **Light-mediated regulation of *ATH1* expression is controlled by central light signaling**  
279 **components**

280 *ATH1* was first identified in our lab as a light-regulated transcription factor gene that is derepressed  
281 in dark-grown *cop1* mutants (Quaedvlieg et al., 1995). COP1, in conjunction with SPA proteins,  
282 functions as a repressor of light signaling in darkness. In the light, phytochrome family members,  
283 activated by red or far-red light (in case of phyA) wavelengths, and cryptochromes 1 and 2,  
284 activated by blue light wavelengths, suppress the activity of the COP1/SPA complex to promote  
285 photomorphogenesis (Ponnu and Hoecker, 2021). Light-mediated *ATH1* expression can be  
286 induced by all three light qualities, involving both phytochrome and cryptochrome family  
287 members. Since COP1 is a downstream signaling component of these photoreceptor families, we  
288 analyzed the role of COP1 in the regulation of *ATH1* expression and rosette growth habit. First,  
289 we compared *ATH1* expression levels in dark-grown Col-8 seedlings to those in dark-grown *cop1-*  
290 *4* mutants, both in the presence and absence of sucrose (Figure 4A). As shown before, in Col-8  
291 *ATH1* expression can be induced in darkness by the addition of sucrose to the growth medium to  
292 a final concentration of one percent, whereas in the absence of sucrose transcript levels remain  
293 low. In line with the observations by Quaedvlieg et al. (1995), in dark-grown *cop1-4* mutants,  
294 carrying a mild loss-of-function allele of *COPI*, *ATH1* expression was clearly derepressed.  
295 Already in the absence of sucrose, *ATH1* mRNA levels accumulated to levels higher than those  
296 observed in Col-8 control plants supplied with one percent sucrose. In the presence of sucrose,  
297 *cop1-4 ATH1* transcript levels increased even further (Figure 4A), indicating that light and sucrose  
298 signaling contribute, at least partially, independently to induce of *ATH1* gene expression.  
299 Consistent with these observations, vegetative internodes of dark-grown *cop1-4* mutants  
300 supplemented with one percent sucrose failed to elongate, contrasting to those of Col-8 control  
301 plants. As a result, *cop1-4* plants adopted a compact rosette growth habit, reminiscent of that seen  
302 in dark-grown, induced *35Spro:ATH1-HBD* plants supplemented with sucrose (Figure 4B, C; 1B).  
303 The compact rosette habit in darkness is lost in *cop1-4 ath1-4* double mutants, indicating that this  
304 photomorphogenesis phenotype requires *ATH1* activity (Figure 4C). However, when compared to  
305 *ath1-4* single mutants, vegetative internode elongation in *cop1 ath1* double mutants is much  
306 reduced, suggesting the involvement of other loci apart from *ATH1* (Figure 4B, C). In the absence  
307 of sucrose, both Col-8 and *cop1-4* seedlings failed to develop beyond the seedling stage in the dark

308 (Figure 4C), most likely due to the lack of stem cell activation at the shoot apex (Pfeiffer et al.,  
309 2016).

310 In addition to COP1, PIFs also function downstream of both phytochrome and cryptochrome light  
311 signaling (Ma et al., 2016; Pedmale et al., 2016; Pham et al., 2018b). PIF-family transcription  
312 factor proteins function as negative regulators of light responses, in a partially redundant manner,  
313 to maintain skotomorphogenesis in dark-grown seedlings. Upon exposure to light, phytochromes  
314 promote the turnover of PIFs, whereas photoactivated CRY1 has been shown to interact with PIF4,  
315 resulting in suppression of the transcriptional activity of PIF4 (Ma et al., 2016). As a consequence,  
316 plants switch from skotomorphogenesis to photomorphogenesis. In line with this, the quadruple  
317 *pif1pif3pif4pif5* (*pifq*) mutant displays a constitutively photomorphogenic phenotype in darkness  
318 (Leivar et al., 2009). In addition to their role as transcription factor proteins, PIFs can directly  
319 interact with COP1, thereby enhancing substrate recognition and ubiquitination activity of the  
320 COP1 E3 ligase complex (Xu et al., 2014; Kathare et al., 2020). Therefore, we tested whether PIF  
321 family members act as upstream mediators of *ATH1* gene expression in the regulation of rosette  
322 habit in Arabidopsis. To this end, we first analyzed rosette habit in a series of dark-grown single,  
323 double, triple, and quadruple *pif* mutant combinations in the presence of one percent sucrose.  
324 Under these conditions, Col-8 control plants display a clearly visible elongation of vegetative  
325 internodes, resulting in loss of rosette habit. In contrast, in the quadruple *pifq* mutant complete  
326 repression of rosette internode elongation was observed, resulting in the formation of a compact  
327 rosette in the absence of light (Figure 5A). Of the single *pif* mutants tested, only *pif4* displayed a  
328 significant reduction in rosette internode length (37% less elongation) when compared to control  
329 plants, whereas *pif3* and *pif7* mutants were largely unaffected. None of the double (*pif1pif3*,  
330 *pif3pif4*, *pif4pif5*) or triple mutants (*pif1pif3pif4*, *pif1pif3pif5*, *pif3pif4pif5*) were as compact as the  
331 *pifq* mutant (Figure 5A), indicating that PIF1, PIF3, PIF4, and PIF5 redundantly contribute to  
332 elongation of rosette internodes in etiolated plants. Of these four proteins, PIF4 contributes the  
333 most, as can be inferred from its single mutant phenotype and the significant inhibition of internode  
334 elongation in all higher order mutants carrying a *pif4* allele, while inhibition of internode  
335 elongation is absent in *pif1pif3* mutants and only subtly enhanced by *pif5* in *pif4pif5* and  
336 *pif3pif4pif5* mutants (Figure 5A).

337 The prominent role of PIFs in the suppression of photomorphogenesis and the striking resemblance  
338 of *pifq* mutants to DEX-induced *35Spro:ATH1-HBD* plants when grown in darkness (Figure 1A,

339 B), prompted us to investigate whether PIF proteins are upstream regulators of *ATH1*. *ATH1*  
340 functions in the shoot apex to control internode elongation. Therefore, *ATH1* transcript levels were  
341 compared between shoot apices of 14-day-old, dark-grown Col-8, *pif4* and *pifq* plants (Figure 5B).  
342 A significant increase in *ATH1* mRNA levels was observed in both *pif4* (1.7x higher) and *pifq* (3x  
343 higher) mutants when compared to control plants, in line with the observed effects on inhibition  
344 of internode elongation. To examine whether this increase in *ATH1* expression is responsible for  
345 the formation of the compact rosette habit observed in *pifq* mutants when grown in darkness, we  
346 introduced the *ath1-3* loss-of-function allele in the *pifq* mutant background and tested the resulting  
347 plants for rosette internode elongation when grown in darkness in the presence of one percent  
348 sucrose (Figure 5C). Under these conditions *pifq* mutants grow a compact rosette, whereas rosette  
349 habit is lost in Col-8 control plants and *ath1* mutants, with the latter having the most elongated  
350 internodes (Figure 5A, C). Surprisingly, vegetative internodes of *pifq ath1* plants were only mildly  
351 elongated, resulting in a partial loss of rosette habit. Compared to *ath1* plants, internodes of *pifq*  
352 *ath1* were on average 70% shorter (Figure 5C). This unexpected result suggests that PIFs control  
353 rosette internode elongation mostly independent of *ATH1* or that the relationship between PIFs  
354 and *ATH1* is more complex. Recently, *PIF4* has been identified as a direct binding target of *ATH1*  
355 (Ejaz et al., 2021). In this study no significant differences in *PIF4* expression could be detected  
356 between *ath1* and WT plants when analyzed on a whole-seedling basis. However, this does not  
357 rule out the presence of a regulatory feedback loop between PIFs and *ATH1* at a tissue-specific  
358 level. Such *ATH1*-PIFs feedback regulation could explain the observed internode phenotype in  
359 *pifq ath1* mutants. To explore the presence of such regulatory interaction between *ATH1* and PIFs,  
360 we quantified expression of PIF family genes in genotypes with altered expression of *ATH1*. We  
361 specifically focused on PIF gene expression in shoot apices (Figure 5D, E) as *ATH1* activity in  
362 the shoot apex underlies its inhibitory effect on internode elongation and PIFs are ubiquitously  
363 expressed (Wu et al., 2020) In sucrose-supplied, dark-grown plants *ATH1* expression levels are  
364 low (Figure 1C, D) and *ATH1* is expected to have an inhibitory effect on *PIF* expression.  
365 Therefore, inducible *35Spro:ATH1-HBD* plants were used to examine the effect of *ATH1* on *PIF1*,  
366 *PIF3*, *PIF4* and *PIF5* mRNA levels in dark conditions (Figure 5D). In light-grown vegetative  
367 plants, *ATH1* expression levels at the shoot apex are relatively high. Therefore, in light conditions  
368 the effect of *ATH1* on gene expression of these four *PIFs* was analyzed using *ath1-3* plants (Figure  
369 5E). In both conditions, a clear effect of *ATH1* on *PIF* gene expression was observed. In dark-

370 grown plants, induction of *ATH1* accumulation in the nucleus resulted in significant down-  
371 regulation of *PIF1*, *PIF3* and *PIF4*, and, to a lesser extent, *PIF5* expression (Figure 5D). On the  
372 other hand, in light-grown plants mRNA levels of *PIF1*, *PIF3*, *PIF4*, and *PIF5* were up-regulated  
373 in the absence of *ATH1*. In *ath1* plants, *PIF1* levels in the shoot apex were up to 9 times higher  
374 when compared to control plants, whereas *PIF3*, *PIF4*, and *PIF5* levels were 2.5-3 times increased  
375 (Figure 5E). When analyzed on a whole-plant level, under both conditions no significant  
376 differences in *PIF* expression levels could be detected between either *35Spro:ATH1-HBD* or *ath1-*  
377 *3* plants and control plants (data not shown). Together, these results indicate that *ATH1* acts as a  
378 negative regulator of, at least, *PIF1*, *PIF3*, *PIF4*, and *PIF5* gene expression, in a tissue-specific  
379 manner. These data support the presence of a regulatory feedback loop at the transcriptional level  
380 between *ATH1* and *PIF* family members where *ATH1* and *PIFs* repress each other's expression.  
381 This *ATH1-PIF* interdependence for suppression of rosette internode elongation could explain the  
382 partial loss of rosette habit in *cop1-4 ath1-4* double mutants observed earlier (Figure 4B, C), since  
383 functional *PIF1*, *PIF3*, *PIF4* and *PIF5* proteins are required for dark-mediated rosette internode  
384 elongation in the absence of *ATH1* (Figure 5C) and these *PIF* proteins are degraded in darkness in  
385 the presence of a *cop1-4* mutation (Pham et al., 2018c; Pham et al., 2018a).  
386 Overall our data show that loss of rosette habit in dark-grown Arabidopsis plants is part of a  
387 skotomorphogenic developmental program, achieved through active repression of *ATH1* gene  
388 expression, mediated by *COP1* and *PIF* family members.

389

### 390 **Photosynthetic sugars are not a prerequisite for light-induced *ATH1* expression**

391 *ATH1* expression in the shoot apex can be induced both by light and sucrose (Figure 1D, E; 3A).  
392 Since light not only acts as a developmental signal, but also as an energy source through  
393 photosynthesis, we wondered about the exact role of light in the induction of *ATH1* gene  
394 expression. Therefore, we examined *ATH1* promoter activity in plants where photosynthesis was  
395 chemically inhibited. To this end, *ATH1pro:GUS* seedlings were grown in darkness for five days,  
396 without metabolizable sugar in the medium to deplete plant metabolizable sugar. Five hours before  
397 light treatment, either norflurazon or lincomycin repressors of photosynthesis were added to the  
398 medium, after which plants were grown for an extra two days in continuous light (Figure 6A).  
399 Compared to mock treatment (0.1% ethanol), inhibition of photosynthesis by chemical interference  
400 resulted in slightly reduced *ATH1* expression (Figure 6B). To avoid potential indirect effects of

401 these pharmacological treatments, we also examined the impact of CO<sub>2</sub> withdrawal on *ATH1*  
402 expression. Removal of CO<sub>2</sub> from the atmosphere, through chemical absorption by NaOH + CaO,  
403 inhibits photosynthetic carbon assimilation and, thereby, the accumulation of metabolizable  
404 sugars. Similar to the pharmacological treatments in the absence of photosynthesis, *ATH1*  
405 promoter activity was decreased, but GUS staining was still clearly visible (Figure 6B; S3A). This  
406 indicates that *ATH1* gene expression is affected by light acting both as a developmental trigger and  
407 as a source of metabolizable sugars through photosynthesis. It further shows that sucrose produced  
408 through photosynthesis contributes to, but is not a prerequisite for light-induced *ATH1* expression.  
409 This is in line with the observation that *ATH1* expression is derepressed in dark-grown *cop1*  
410 seedlings even in the absence of sucrose (Figure 4A).

411 Sugars function as energy resource and as signaling molecules (Li and Sheen, 2016). To  
412 distinguish between these two functions in the induction of *ATH1* expression at the SAM Col-8  
413 plants were grown in darkness in the presence of either sorbitol, sucrose, glucose, fructose, or  
414 palatinose, followed by quantification of *ATH1* mRNA levels and promoter activity (Figure 6C;  
415 S3C). Sorbitol and palatinose are both non-metabolizable sugars. Palatinose is a metabolically  
416 inactive structural isomer of sucrose that was shown to function as a signaling molecule, whereas  
417 sorbitol is neither metabolized nor a signaling molecule (Ramon et al., 2008). Glucose, fructose  
418 and sucrose are metabolizable sugars also known to function as signaling molecules (Rabot et al.,  
419 2012). Neither sorbitol nor palatinose addition resulted in a significant induction of *ATH1*  
420 expression, whereas a clear increase in *ATH1* could be observed when either sucrose, glucose or,  
421 to a lower extent, fructose was present in the growth medium (Figure 6C). These findings strongly  
422 suggest that sugars as energy source induce *ATH1* expression.

423

#### 424 **Sucrose and light independently regulate *ATH1* expression via TOR kinase**

425 TOR kinase, a critical sensor of resource availability, is required for the activation of both shoot  
426 and root apical meristems (Xiong et al., 2013; Pfeiffer et al., 2016; Li et al., 2017). TOR kinase  
427 integrates, among others, energy and environmental cues, including light signals to direct growth  
428 and development. The fundamental role of TOR kinase in coordinating growth and development  
429 downstream of light and energy signals, led us to investigate whether induction of *ATH1*  
430 expression involves TOR kinase activity. Employing a similar experimental setup as mentioned in  
431 the previous section, the effect of the ATP-competitive TOR kinase inhibitor AZD-8055 on light-



432 and sucrose-induced *ATH1* promoter activity was studied. AZD-8055 was added to 5-day-old,  
433 dark-grown *ATH1pro:GUS* seedlings. After 5 hours either sucrose was added to the growth  
434 medium and plants were left to continue growing in darkness, or plants were shifted to continuous  
435 light conditions for 48 hours (Figure 6A). Light-mediated induction of *ATH1* promoter activity  
436 was efficiently suppressed by AZD-8055, resulting in complete inhibition of promoter activity at  
437 a concentration 0.5  $\mu$ M (Figure 6D). Similarly, addition of AZD-8055 fully inhibited the positive  
438 effect of sucrose on *ATH1* promoter activity at the shoot apex (Figure 6E; S3B).

439 AZD-8055 is a selective and potent TOR inhibitor (Montané and Menand, 2013; Dong et al.,  
440 2015), but the use of pharmacological agents poses a risk of non-anticipated side effects. Loss-of-  
441 function *tor* mutants are embryo lethal (Menand et al., 2002), and therefore the previously reported  
442 ethanol-inducible TOR-RNAi line, *35S:ALCR alcA:RNAi-TOR* and its control line *35S:ALCR*  
443 *alcA:GUS* (Deprost et al., 2007), were used to further study the effects of reduced TOR kinase  
444 activity on *ATH1* gene expression. In line with our AZD-8055 experiments, conditional silencing  
445 of the AtTOR gene by ethanol in *35S:ALCR alcA:RNAi-TOR* seedlings led to complete inhibition  
446 of sucrose-mediated induction of *ATH1* expression (Figure 6F). These results imply that light and  
447 metabolic signals converge on TOR kinase in controlling induction of *ATH1* expression at the  
448 SAM.

449 Recently, it was reported that TOR kinase and downstream signaling contribute to the de-etiolation  
450 process and that COP1 represses TOR activity during skotomorphogenic development (Chen et  
451 al., 2018). We therefore tested whether derepression of *ATH1* expression in dark-grown *cop1*  
452 mutants is also TOR dependent. QPCR analysis revealed that this is indeed the case, as in the  
453 presence of AZD-8055 *ATH1* expression is no longer derepressed in dark-grown *cop1-4* plants  
454 (Figure S4).

455 In conclusion, these findings suggest TOR kinase integrates light and sucrose signals leading to  
456 activation of *ATH1* gene expression at the shoot apex (Figure 7). Upstream of TOR kinase, a PHY-  
457 COP1 regulatory pathway functions as a negative regulator of TOR activity. When grown in  
458 darkness, COP1 inhibits TOR, resulting in repression of *ATH1*. As a consequence, in dark-grown  
459 plants compact rosette habit is lost due to activation of stem development, resulting in the  
460 elongation of vegetative internodes. In the light, COP1 activity is inhibited allowing for TOR  
461 kinase to induce *ATH1* expression in the shoot apex as part of the deetiolation process, giving rise  
462 to the compact rosette habit that is characteristic for *A. thaliana*.

463

## 464 **Discussion**

465 In plants most of the adult body is formed post-embryonically by the continuous activity of pools  
466 of undifferentiated progenitor cells: the shoot and root apical meristems. Both apical meristems  
467 are established during plant embryogenesis. At the completion of embryogenesis the apical  
468 meristems are quiescent, but become reactivated after seed germination. In *A. thaliana*  
469 (*Arabidopsis*), light is crucial for reactivation of the shoot apical meristem (López-Juez et al., 2008;  
470 Arsovski et al., 2012; Pfeiffer et al., 2016; Mohammed et al., 2017). A direct outcome of light-  
471 activation of the meristem is the production of leaves. In rosette plants, such as *Arabidopsis*, the  
472 newly formed leaves give rise to a basal rosette: a whorl of leaves that has little to no elongation  
473 between successive nodes. The rosette habit is widespread amongst flowering plants and provides  
474 several advantages compared to taller, less compact plants, such as protection from (a)biotic  
475 stresses (Schaffer and Schaffer, 1979; Bello et al., 2005; Larcher et al., 2010; Thomson et al., 2011;  
476 Fujita and Koda, 2015). In *Arabidopsis*, light requirement for SAM activation can be overcome by  
477 availability of metabolizable sugars, such as sucrose, to the meristem (Roldán et al., 1999; Li et  
478 al., 2012). However, under such conditions plants fail to establish a typical compact rosette.  
479 Instead, they display a caulescent growth habit due to elongation of rosette internodes. Here we  
480 show that this dramatic change in growth habit in the absence of light is caused by premature  
481 activation of the rib zone due to insufficient expression of the light-mediated TALE homeobox  
482 gene *ATH1* in the shoot meristem. Our observations confirm a fundamental role for *ATH1* in  
483 *Arabidopsis* rosette growth habit and supports a role for TOR kinase as a central hub for integration  
484 of energy and light signaling in controlling cell differentiation and organ initiation at the SAM.  
485 Previously, both activation of the SAM following germination, via induction of *WUSCHEL*  
486 (*WUS*), as well as subsequent initiation of leaf primordia were shown to be synergistically  
487 controlled by light-signaling pathways and photosynthesis-derived sugars, both conveyed by TOR  
488 kinase (Li et al., 2012; Pfeiffer et al., 2016). Here we show that induction of *ATH1* expression at  
489 the SAM, required to inhibit rib zone activation during vegetative development, is additively  
490 induced by sugar and light-signaling and that TOR kinase activity is essential for both inputs. Thus,  
491 TOR kinase integrates light and energy signals to activate the central population of stem cells in  
492 the SAM and subsequent differentiation processes at the periphery of the meristem but,  
493 interestingly, also represses differentiation processes by inhibiting rib zone activity at the basal

494 part of the meristem. Induction of *ATH1* through these signals might indirectly result from SAM  
495 activation. However, we think this is unlikely as, in the absence of sucrose, the SAM of dark-  
496 grown *cop1* mutants remains dormant, while *ATH1* is expressed to relatively high levels. In  
497 addition, SAM activation and *ATH1* induction responses differ in their sensitivity to sucrose.  
498 Sucrose concentrations adequate to activate the SAM and initiate organogenesis, fail to induce  
499 significant levels of *ATH1*.

500 How TOR kinase controls *ATH1* promoter activity is currently unknown. TOR kinase is a major  
501 regulator of mRNA translation in all eukaryotic cells (Schepetilnikov and Ryabova, 2017).  
502 Moreover, light/dark transitions are also known to modulate mRNA translation in plants (Liu et  
503 al., 2012). Therefore, the effect of TOR kinase on *ATH1* is most likely indirect, as was recently  
504 reported for *WUS* by Janocha et al. (2021) who show that TOR kinase indirectly induces *WUS*  
505 expression by controlling cytokinin levels in the SAM through translational regulation of cytokinin  
506 catabolic enzymes.

507 In the absence of light, *ATH1* gene expression is repressed by negative regulators of  
508 photomorphogenesis, including COP1 (Quaedvlieg et al., 1995). This fits well with the observation  
509 that in darkness COP1 represses TOR kinase (Chen et al., 2018). Here we report that, in darkness,  
510 sucrose can substitute for light to induce *ATH1* expression and this also requires TOR kinase  
511 activity (Figure 7). As sucrose-mediated induction of *ATH1* can still be observed in a *cop1* mutant  
512 background, sucrose affects TOR kinase activity most likely independently of COP1. Light  
513 signaling inactivates COP1, resulting in an induction of auxin biosynthesis. Auxin then activates  
514 the small Rho-like GTPase ROP2, which in turn activates TOR (Cai et al., 2017; Li et al., 2017;  
515 Schepetilnikov et al., 2017). Constitutive expression of activated ROP2 stimulates TOR in the  
516 shoot apex and is sufficient to promote organogenesis in the absence of light (Li et al., 2017).  
517 Sugars are known to trigger the accumulation of auxin, along with its biosynthetic precursors and  
518 this could be how sucrose activates TOR kinase in darkness, in the presence of COP1 (Chourey et  
519 al., 2010; LeClere et al., 2010; Sairanen et al., 2012; Mohammed et al., 2017). Worth mentioning  
520 in this respect is that the same set of PIF proteins that we identified as repressors of *ATH1*  
521 expression, negatively regulate sugar-induced auxin biosynthesis (Sairanen et al., 2012).

522 In the presence of light, expression of *ATH1* is induced in a functionally redundant manner by  
523 multiple cryptochrome and phytochrome photoreceptors operating in response to broad  
524 wavelengths from blue to far-red light (Figure 7). This ensures presence of *ATH1* in the SAM

525 under all light conditions and thus inhibition of rib zone activity, resulting in the characteristic  
526 compact rosette growth habit of Arabidopsis plants. In line with this, loss of rosette habit has been  
527 observed in light-grown Arabidopsis plants lacking multiple functional phytochrome and/or  
528 cryptochrome photoreceptors. Control of vegetative internode elongation in response to changes  
529 in light quality or ambient temperature was shown to be mediated by the concerted action of phyA,  
530 phyB, phyD, phyE, and/or CRY1, all of which we identified here as having a role in light-mediated  
531 induction of *ATH1* expression (Devlin et al., 1996; Whitelam and Devlin, 1997; Devlin et al., 1998;  
532 Whitelam et al., 1998; Devlin et al., 1999; Mazzella et al., 2000; Devlin et al., 2003; Franklin et  
533 al., 2003a; Kanyuka et al., 2003; Strasser et al., 2010; Zhang et al., 2017). Often not appreciated  
534 in literature, compact rosette growth is thus a genuine photomorphogenic trait in Arabidopsis.  
535 Remarkably, rosette growth habit is a non-plastic trait, unlike other photoreceptor-driven  
536 developmental responses in Arabidopsis, such as elongation of hypocotyl, petiole, and  
537 inflorescence stem. A compact rosette habit is not affected in wildtype plants even under light  
538 quality conditions or temperature regimes that cause rapid elongation of aerial plant organs.  
539 Plasticity of growth and development is often considered adaptive, enabling sessile plants to adjust  
540 rapidly to a changing environment (Schlichting, 1986; Schlichting and Levin, 1986). However, as  
541 mentioned, rosette growth habit provides several advantages compared to a caulescent growth  
542 habit. Loss of a compact rosette in response to environmental cues, therefore, might be detrimental  
543 to plant fitness and viability. A compact rosette habit is not constitutively expressed in all rosette  
544 species (our unpublished observations) and this trait, as a result of selection, may have become  
545 fixed in Arabidopsis through genetic assimilation (Ehrenreich and Pfennig, 2016). Important  
546 contributors to genetic assimilation are genetic variants that alter gene regulation. Plausible ways  
547 in which gene regulation might facilitate loss of phenotypic plasticity are i) decoupling of the  
548 regulation of genes that control a plastic trait from environmental cues or ii) the evolution of  
549 additional regulatory pathways that makes their expression insensitive to the environment  
550 (Ehrenreich and Pfennig, 2016). The latter explanation (ii) might be true in the case of Arabidopsis  
551 rosette growth habit, given that *ATH1* expression is induced in response to broad wavelengths and  
552 involves multiple photoreceptors. Moreover, it has been proposed that *ATH1* controls internode  
553 elongation by antagonizing a large number of genes that promote internode growth, mostly  
554 independent of each other (Ejaz et al., 2021). This assumption fits with the observation that *pifq*  
555 reduced internode elongation in *ath1-3* only by about 70%. Such multitarget control by *ATH1* of

556 genes that affect internode elongation would further contribute to the robustness of rosette growth  
557 habit in *A. thaliana*. Therefore, it is of interest to investigate whether ATH1 has a similar role in  
558 other rosette species and, if so, whether differences in plasticity of rosette compactness can be  
559 linked to differences in light-signaling control of *ATH1* expression and/or decoupling genes that  
560 affect internode elongation from ATH1 regulation.

561 In this study, we identified *PIF1*, *PIF3*, *PIF4*, and *PIF5* as transcriptional targets of ATH1. Of  
562 these, *PIF4* and several steps of the PIF pathway, were previously identified as a binding target of  
563 ATH1 (Ejaz et al., 2021). Therefore, ATH1 might affect the expression of these four *PIF* genes  
564 through direct transcriptional repression. Our finding that *PIF4*, and at least one of the other PIF  
565 proteins, *PIF1*, *PIF3*, or *PIF5*, in turn function as negative regulators of *ATH1* expression suggest  
566 the presence of a double-negative feedback loop between ATH1 and PIF family members (Figure  
567 7). Signaling systems like ATH1 and PIFs that contain double-negative feedback loops can, in  
568 principle, convert graded inputs into switch-like, irreversible responses (Ferrell, 2002). Such a  
569 genetic toggle switch is a bistable dynamical system, possessing two stable equilibria, each  
570 associated to a fully expressed protein. ATH1 has a fundamental role in maintaining the  
571 Arabidopsis rosette habit during vegetative growth. When grown in the presence of light, *ATH1* is  
572 expressed throughout the shoot meristem, including the subapical region where it represses stem  
573 growth. Plant switching to reproductive growth rapidly downregulate *ATH1* at the shoot meristem,  
574 marking the onset of bolting and emergence of an elongated inflorescence (Proveniers et al., 2007;  
575 Gómez-Mena and Sablowski, 2008; Ejaz et al., 2021). Such stem elongation is absent in plants  
576 constitutively expressing *ATH1*, without affecting formation of flowers (Cole et al., 2006; Gómez-  
577 Mena and Sablowski, 2008; Rutjens et al., 2009). The data presented in this study show that both  
578 absence of ATH1 and induced ATH1 expression, leads to pronounced changes in *PIF* gene  
579 expression at the SAM associated with significant elongation or complete suppression of rosette  
580 internodes, respectively. PIF proteins have been associated with bolting time and/or stem internode  
581 elongation (Brock et al., 2010; Todaka et al., 2012; Galvão et al., 2019; Arya et al., 2021;  
582 Jenkitkonchai et al., 2021). Moreover, elongated rosette internodes can be observed *35S::PIF4*  
583 plants (see Figure 1d in Kumar et al. (2012)). It is therefore proposed that an ATH1-PIF toggle  
584 switch underlies the rapid and distinctive switch in Arabidopsis growth habit that marks floral  
585 transition.

586

## 587 **Methods**

### 588 **Plant material and growth conditions**

589 Arabidopsis seeds were obtained from the Nottingham Arabidopsis stock center  
590 (<http://arabidopsis.info/>; stock number between brackets) or were kind gifts of colleagues. The  
591 following genotypes were used: Col-8 wild type (N60000), *Ler* wild-type (NW20), *phyB-5* (Reed  
592 et al., 1993), *phyBDE* (Shalitin et al., 2002), *phyABDE* (Franklin et al., 2003b), *phyBcry1*  
593 (Mazzella et al., 2000) *cry1-1* (Ahmad and Cashmore, 1993), *hyl-1* (Muramoto et al., 1999),  
594 *hylcry1*, *hylcry2*, *hylcry1cry2* (López-Juez et al., 2008), *pif3-1* (N530753; Kim et al., 2003), *pif4-*  
595 *1* (N667486; Huai et al., 2018), *pif4pif5* (N68096; Leivar et al., 2012), *pif7-1* (N68809), *pif3pif4*  
596 (N66046), *pif1pif3* (N66045), *pif1pif3pif4* (N66500), *pif1pif3pif5* (N66047), *pif3pif4pif5*  
597 (N66048), *pif1pif3pif4pif5* (*pifq*; N66049) (Leivar et al., 2008), *cop1-4* (McNellis et al., 1994),  
598 *Pro35S:HA-ATH1*, *ATH1pro:GUS*, *ath1-3* (Proveniers et al., 2007), *ath1-4* (Li et al., 2012) and  
599 *35Spro:ATH1-HBD* lines (Rutjens et al., 2009), *35S::ALCR alcA:RNAi-TOR* and *35S:ALCR*  
600 *alcA:GUS* (Deprost et al., 2007).

601 To introduce *ATH1pro:GUS* in Col-8, *Ler*, *phyB*, *phyBcry1*, and *phyBDE* backgrounds, the  
602 original *ATH1pro:GUS* line was crossed into the respective genotypes and the resulting offspring  
603 was backcrossed at least four times to the parental acceptor lines. For ectopic expression of *ATH1*  
604 in photoreceptor mutants, *Ler*, *phyB*, *phyBcry1*, *phyBDE*, and *hylcry1cry2* plants were  
605 transformed with a *HA*-tagged version of *ATH1* (*Pro35S:HA-ATH1*) as described previously  
606 (Proveniers et al., 2007). Transgenic seeds were selected based on seed GFP expression. Per  
607 genotype over ten independent, homozygous single insert lines were used for further analysis. To  
608 obtain *ath1-3 pifq* plants, F2 offspring plants from a cross *ath1-3* x *pifq* were preselected based on  
609 a, for higher-order *pif* mutants, characteristic short-petiole phenotype. Selected plants were then  
610 genotyped for homozygous presence of all five mutant alleles using the primers listed in  
611 Supplemental Table S2. To obtain *cop1-4 ath1-4* plants, F2 offspring plants from a cross *cop1-4*  
612 x *ath1-4*, homozygous for the *cop1* mutation, were selected under dark conditions for a short-  
613 hypocotyl phenotype. Subsequently, selected seedlings were transferred to normal growth  
614 conditions and genotyped for the *ath1-4* mutation.

615 For plant growth, seeds were chlorine gas sterilized in a desiccator for 4 h using a mixture of 4 ml  
616 37% HCl and 100 ml commercial bleach (Glorix; contains 4.5% active chlorine) and put on soil  
617 (Primasta) or on sterile 0.8% plant agar (Duchefa Biochemie) with full strength Murashige-Skoog



618 medium (MS salts including MES Buffer (pH 5.8) and vitamins, Duchefa Biochemie) in square  
619 Petri dishes (120x120 mm). After 2-3 days of stratification (4°C, darkness), plants were grown in  
620 climate-controlled growth cabinets (Snijders, Microclima 1000) in either a short day (SD; 8 hours  
621 light/16 hours dark) or a long day (LD; 16 hours light/8 hours dark) photoperiod, under 120  $\mu\text{mol}$   
622  $\text{m}^{-2} \text{s}^{-1}$  photosynthetic active radiation (PAR) fluorescent white-light conditions (Sylvania,  
623 Luxline Plus Cool White) and 70% relative humidity. For growth of plants under monochromatic  
624 light conditions, plants were grown in a Snijders Microclima growth cabinet equipped with Philips  
625 GreenPower LEDs (red light (124.35  $\mu\text{mol m}^{-2} \text{s}^{-1}$ ), blue light (6.14  $\mu\text{mol m}^{-2} \text{s}^{-1}$ ) or far-red  
626 light (77.57  $\mu\text{mol m}^{-2} \text{s}^{-1}$ )).

627 For liquid culture, Arabidopsis seedlings were grown in 100 mL bottles on a rotary shaker (185  
628 rpm, 22 °C). Per bottle, ten to twenty seeds were added to 20 mL half-strength MS medium (MS  
629 salts including MES Buffer (pH 5.8) and vitamins, Duchefa Biochemie) and bottles were sealed  
630 with Steristoppers® (Heinz Herenz, Hamburg). After stratification, seeds were exposed to  
631 fluorescent light (1-1.5 hours, 120  $\mu\text{mol/m}^2/\text{s}$ ) to stimulate germination, after which the bottles  
632 were wrapped in aluminum foil to avoid any further light exposure. Unless stated otherwise, sterile  
633 sucrose (50% w/v) or sorbitol (50% w/v) was added to a final concentration of 1% v/v either at the  
634 beginning or at day three of the experiment.

635

## 636 **Phenotypic analyses**

### 637 *Rosette internode elongation*

638 For light-grown plants, total rosette internode length was measured using a digital caliper. For  
639 dark-grown seedlings, plants were photographed after three weeks of growth in liquid medium and  
640 ImageJ (Schneider et al., 2012) was used to measure total rosette internode length. To determine  
641 the average rosette internode length total rosette internode length was divided by the total number  
642 of rosette leaves. In light-grown plants, the first leaf to give rise to a secondary inflorescence was  
643 defined as the first cauline leaf. Dark-grown plants were never grown long enough to reach the  
644 reproductive phase.

### 645 *Meristem cell size*

646 Using confocal laser scanning microscopy, longitudinal optical sections were made through apices  
647 of five-day-old seedlings. In median sections a central cell file extending from the epidermis into  
648 the subapical region where the hypocotyl vascular strands converge was identified. Using ImageJ

649 software ((NIH; <https://imagej.nih.gov/ij/>), individual cell lengths were then measured per position  
650 in apical-basal direction.

651

### 652 **Gene expression analysis (qPCR)**

653 All samples (whole seedlings or SAM-enriched tissue) were snap-frozen in liquid N<sub>2</sub> and stored  
654 at -80°C before RNA extraction. For each experiment 3 or 4 biological replicates and two technical  
655 replicates were included. RNA was isolated using a RNeasy mini or micro kit (Qiagen,  
656 <http://www.qiagen.com/>). Genomic DNA was removed using DNaseI (Thermo Scientific) and  
657 cDNA was synthesized from 500 ng - 1 µg RNA using RevertAid H Minus Reverse Transcriptase  
658 and Ribolock RNase inhibitor (Thermo Scientific) using a mix of anchored odT(20) primers (Jena  
659 Bioscience) and random hexamers (IDT). qPCR reactions were performed using qPCRBIO  
660 SyGreen Blue mix (PCRBIO) on a ViiA7 Real Time PCR system and ViiA7 software was used to  
661 analyze the data. Relative expression levels were calculated using the  $\Delta\Delta C_t$  method (Livak and  
662 Schmittgen, 2001), normalized to the expression of the reference genes *GAPC2* (AT1G13440)  
663 and/or *MUSE3* (AT5G15400). Differences between mutant and wild-type  $\Delta\Delta C_t$  values were  
664 statistically analyzed with an independent sample t-test or ANOVA test ( $p < 0.05$ ) in Rstudio  
665 version 1.2.5033. For primer sequences used, see [Supplemental Table S1](#).

666

### 667 **$\beta$ -Glucuronidase Staining and Microscopy**

668 Seven-day-old seedlings were harvested and vacuum-infiltrated in  $\beta$ -glucuronidase (GUS) staining  
669 buffer (50 mM sodium phosphate buffer (pH=7.2), supplemented with 0.1% Triton X-100, 100  
670 mM, potassium ferrocyanide, 100 mM, potassium ferricyanide, 2 mM 5-bromo-4-chloro-3-indolyl  
671 glucuronide). Samples were incubated at room temperature for 16 hours and subsequently cleared  
672 in ethanol baths with increasing concentration (20%, 30%, 50%, and 70%). Images were taken  
673 with a Nikon DXMI200 camera attached to a Zeiss Stemi SV11 stereo microscope. The GUS  
674 staining area in the shoot apex was measured and quantified using Image J (NIH;  
675 <https://imagej.nih.gov/ij/>).

676

### 677 **Confocal microscopy**

678 Five-day-old Col-8, *ath1-4*, and *35Spro:ATH1-HBD* seedlings were grown in either continuous  
679 darkness supplied with one percent sucrose or in continuous light at 27°C. Seedlings were cleared

680 using the ClearSee method (Kurihara et al., 2015) and imaged at a resolution of 0.25 x 0.25 x 0.5  
681  $\mu\text{m}$  using a Confocal Laser Scanning microscope Carl Zeiss LSM880 Fast AiryScan with a Plan-  
682 Apochromat 63x/1,2 Imm Korr DIC objective (numerical aperture 1.40, oil immersion) and ZEN  
683 software (blue edition, Carl Zeiss). Staining of apices with Calcofluor White Stain (Sigma-  
684 Aldrich) was performed as described before (Ursache et al., 2018). Excitation was at 405 nm and  
685 emission filters were set between 425 nm and 475 nm. All replicate images were acquired using  
686 identical confocal microscopy parameters for each experiment. Confocal images were processed  
687 with Fiji (version 1.52, Fiji) and Adobe Illustrator.

688

### 689 **Statistical analysis**

690 Data plotting and statistical analysis were performed using RSTUDIO.1.0.143 ([www.rstudio.com](http://www.rstudio.com))  
691 with R v.3.6.2 (<https://cran.r-project.org/>). The significance of differences between experimental  
692 groups was determined by using the student's t-test as indicated in each experiment. The  
693 significance level of differences between two experimental groups was either marked as \*,  $p < 0.05$ ;  
694 \*\*,  $p < 0.01$ ; \*\*\*,  $p < 0.001$ ; ns, not significant or indicated by the corresponding P values. In order  
695 to compare the significance of differences between multiple experimental groups, the Fisher's least  
696 significant difference (LSD) test and one-way analysis of variance (ANOVA) were performed  
697 using the Bonferroni correction with an  $\alpha = 0.05$  from the agricolae package (Mendiburu, 2020).  
698 Images containing micrographs and other images were compiled using Adobe Illustrator and  
699 ImageJ software (<https://imagej.nih.gov/ij/>) to create the figures.

700

### 701 **Author contributions**

702 Conceptualization: M.P.; Methodology: M.P., S.S.H., S.S.S., and E.S.; Investigation: S.S.H., E.S.,  
703 N.P., G.B., and S.S.S.; Writing – Original Draft: M.P. and S.S.H.; Writing – Review & Editing,  
704 M.P., S.S.H., S.S.S., E.S. and S.S.; Funding Acquisition: M.P., S.S.H., S.S. ; Visualization: S.S.H.;  
705 Resources: M.P., E.S., and S.S.; Supervision: M.P. and S.S.

706

### 707 **Acknowledgements**

708 *phyA cry1*, *phyB cry1* and *phyA phyB cry1* seeds were a kind gift of Jorge Casal. *hyl*, *cry1*, *cry2*,  
709 *cry1 cry2*, *hyl cry1*, *hyl cry2*, and *hyl cry1 cry2* seeds were a kind gift of Enrique Lopez-Juez and  
710 *cop1-4* seeds were kind gift of Jan Lohmann.

711

## 712 **References**

713

714 Ahmad, M., and Cashmore, A. R. (1993). HY4 gene of *A. thaliana* encodes a protein with  
715 characteristics of a blue-light photoreceptor. *Nature* 366:162–166.

716 Araki, T., and Komeda, Y. (1993). Flowering in darkness in *Arabidopsis thaliana*. *Plant J* 4:801–  
717 811.

718 Arsovski, A. A., Galstyan, A., Guseman, J. M., and Nemhauser, J. L. (2012). Photomorphogenesis.  
719 *Arabidopsis Book* 2012:e0147.

720 Arya, H., Singh, M. B., and Bhalla, P. L. (2021). Overexpression of PIF4 affects plant morphology  
721 and accelerates reproductive phase transitions in soybean. *Food Energy Secur* 10.

722 Bello, F. D., Lepš, J., and Sebastià, M.-T. (2005). Predictive value of plant traits to grazing along  
723 a climatic gradient in the Mediterranean. *J Appl Ecol* 42:824–833.

724 Bencivenga, S., Serrano-Mislata, A., Bush, M., Fox, S., and Sablowski, R. (2016). Control of  
725 Oriented Tissue Growth through Repression of Organ Boundary Genes Promotes Stem  
726 Morphogenesis. *Dev Cell* 39:198–208.

727 Brock, M. T., Maloof, J. N., and Weinig, C. (2010). Genes underlying quantitative variation in  
728 ecologically important traits: PIF4 (PHYTOCHROME INTERACTING FACTOR 4) is  
729 associated with variation in internode length, flowering time, and fruit set in *Arabidopsis*  
730 *thaliana*. *Mol Ecol* 19:1187–1199.

731 Cai, W., Li, X., Liu, Y., Wang, Y., Zhou, Y., Xu, T., and Xiong, Y. (2017). COP1 integrates light  
732 signals to ROP2 for cell cycle activation. *Plant Signal Behav* 12:e1363946.

733 Chen, M., and Chory, J. (2011). Phytochrome signaling mechanisms and the control of plant  
734 development. *Trends Cell Biol* 21:664–671.

735 Chen, G.-H., Liu, M.-J., Xiong, Y., Sheen, J., and Wu, S.-H. (2018). TOR and RPS6 transmit light  
736 signals to enhance protein translation in deetioliating *Arabidopsis* seedlings. *Proc National Acad*  
737 *Sci* 115:12823–12828.

738 Chourey, P. S., Li, Q.-B., and Kumar, D. (2010). Sugar–Hormone Cross-Talk in Seed  
739 Development: Two Redundant Pathways of IAA Biosynthesis Are Regulated Differentially in  
740 the Invertase-Deficient miniature1 (*mn1*) Seed Mutant in Maize. *Mol Plant* 3:1026–1036.

741 Cole, M., Nolte, C., and Werr, W. (2006). Nuclear import of the transcription factor SHOOT  
742 MERISTEMLESS depends on heterodimerization with BLH proteins expressed in discrete  
743 sub-domains of the shoot apical meristem of *Arabidopsis thaliana*. *Nucleic Acids Res* 34:1281–  
744 1292.

- 745 Deng, X., and Quail, P. H. (1992). Genetic and phenotypic characterization of cop1 mutants of  
746 *Arabidopsis thaliana*. *Plant J* 2:83–95.
- 747 Deprost, D., Yao, L., Sormani, R., Moreau, M., Leterreux, G., Nicolai, M., Bedu, M., Robaglia,  
748 C., and Meyer, C. (2007). The Arabidopsis TOR kinase links plant growth, yield, stress  
749 resistance and mRNA translation. *Embo Rep* 8:864–870.
- 750 Devlin, P. F., Halliday, K. J., Harberd, N. P., and Whitelam, G. C. (1996). The rosette habit of  
751 *Arabidopsis thaliana* is dependent upon phytochrome action: novel phytochromes control  
752 internode elongation and flowering time. *Plant J* 10:1127–1134.
- 753 Devlin, P. F., Patel, S. R., and Whitelam, G. C. (1998). Phytochrome E Influences Internode  
754 Elongation and Flowering Time in Arabidopsis. *Plant Cell* 10:1479–1487.
- 755 Devlin, P. F., Robson, P. R. H., Patel, S. R., Goosey, L., Sharrock, R. A., and Whitelam, G. C.  
756 (1999). Phytochrome D Acts in the Shade-Avoidance Syndrome in Arabidopsis by Controlling  
757 Elongation Growth and Flowering Time. *Plant Physiol* 119:909–916.
- 758 Devlin, P. F., Yanovsky, M. J., and Kay, S. A. (2003). A Genomic Analysis of the Shade  
759 Avoidance Response in Arabidopsis. *Plant Physiol* 133:1617–1629.
- 760 Dong, P., Xiong, F., Que, Y., Wang, K., Yu, L., Li, Z., and Ren, M. (2015). Expression profiling  
761 and functional analysis reveals that TOR is a key player in regulating photosynthesis and  
762 phytohormone signaling pathways in Arabidopsis. *Front Plant Sci* 6:677.
- 763 Ehrenreich, I. M., and Pfennig, D. W. (2016). Genetic assimilation: a review of its potential  
764 proximate causes and evolutionary consequences. *Ann Bot-london* 117:769–779.
- 765 Ejaz, M., Bencivenga, S., Tavares, R., Bush, M., and Sablowski, R. (2021). ARABIDOPSIS  
766 THALIANA HOMEBOX GENE 1 controls plant architecture by locally restricting  
767 environmental responses. *Proc National Acad Sci* 118:e2018615118.
- 768 Ferrell, J. E. (2002). Self-perpetuating states in signal transduction: positive feedback, double-  
769 negative feedback and bistability. *Curr Opin Cell Biol* 14:140–148.
- 770 Franklin, K. A., Praekelt, U., Stoddart, W. M., Billingham, O. E., Halliday, K. J., and Whitelam,  
771 G. C. (2003a). Phytochromes B, D, and E Act Redundantly to Control Multiple Physiological  
772 Responses in Arabidopsis. *Plant Physiol* 131:1340–1346.
- 773 Franklin, K. A., Davis, S. J., Stoddart, W. M., Vierstra, R. D., and Whitelam, G. C. (2003b). Mutant  
774 Analyses Define Multiple Roles for Phytochrome C in Arabidopsis Photomorphogenesis. *Plant*  
775 *Cell* 15:1981–1989.
- 776 Fujita, N., and Koda, R. (2015). Capitulum and rosette leaf avoidance from grazing by large  
777 herbivores in *Taraxacum*. *Ecol Res* 30:517–525.

- 778 Galvão, V. C., Fiorucci, A.-S., Trevisan, M., Franco-Zorilla, J. M., Goyal, A., Schmid-Siegert, E.,  
779 Solano, R., and Fankhauser, C. (2019). PIF transcription factors link a neighbor threat cue to  
780 accelerated reproduction in *Arabidopsis*. *Nat Commun* 10:4005.
- 781 Gómez-Mena, C., and Sablowski, R. (2008). ARABIDOPSIS THALIANA HOMEODOMAIN GENE1  
782 Establishes the Basal Boundaries of Shoot Organs and Controls Stem Growth. *Plant Cell*  
783 20:2059–2072.
- 784 Huai, J., Zhang, X., Li, J., Ma, T., Zha, P., Jing, Y., and Lin, R. (2018). SEUSS and PIF4  
785 Coordinately Regulate Light and Temperature Signaling Pathways to Control Plant Growth.  
786 *Mol Plant* 11:928–942.
- 787 Jacquard, A., Gadisseur, I., and Bernier, G. (2003). Cell Division and Morphological Changes in  
788 the Shoot Apex of *Arabidopsis thaliana* during Floral Transition. *Ann. Bot.* 91:571–576.
- 789 Janocha, D., Pfeiffer, A., Dong, Y., Novák, O., Strnad, M., Ryabova, L. A., and Lohmann, J. U.  
790 (2021). TOR kinase controls shoot development by translational regulation of cytokinin  
791 catabolic enzymes. *Biorxiv Advance Access published 2021*, doi:10.1101/2021.07.29.454319.
- 792 Jenkitkonchai, J., Marriott, P., Yang, W., Sriden, N., Jung, J., Wigge, P. A., and Charoensawan,  
793 V. (2021). Exploring PIF4's contribution to early flowering in plants under daily variable  
794 temperature and its tissue-specific flowering gene network. *Plant Direct* 5:e339.
- 795 Kanyuka, K., Praekelt, U., Franklin, K. A., Billingham, O. E., Hooley, R., Whitlam, G. C., and  
796 Halliday, K. J. (2003). Mutations in the huge *Arabidopsis* gene BIG affect a range of hormone  
797 and light responses. *Plant J* 35:57–70.
- 798 Kathare, P. K., Xu, X., Nguyen, A., and Huq, E. (2020). A COP1-PIF-HEC regulatory module  
799 fine-tunes photomorphogenesis in *Arabidopsis*. *Plant J* 104:113–123.
- 800 Kim, J., Yi, H., Choi, G., Shin, B., Song, P.-S., and Choi, G. (2003). Functional Characterization  
801 of Phytochrome Interacting Factor 3 in Phytochrome-Mediated Light Signal Transduction.  
802 *Plant Cell* 15:2399–2407.
- 803 Kumar, S. V., Lucyshyn, D., Jaeger, K. E., Alós, E., Alvey, E., Harberd, N. P., and Wigge, P. A.  
804 (2012). Transcription factor PIF4 controls the thermosensory activation of flowering. *Nature*  
805 484:242–245.
- 806 Kurihara, D., Mizuta, Y., Sato, Y., and Higashiyama, T. (2015). ClearSee: a rapid optical clearing  
807 reagent for whole-plant fluorescence imaging. *Development* 142:4168–4179.
- 808 Larcher, W., Kainmüller, C., and Wagner, J. (2010). Survival types of high mountain plants under  
809 extreme temperatures. *Flora - Morphol Distribution Funct Ecol Plants* 205:3–18.
- 810 LeClere, S., Schmelz, E. A., and Chourey, P. S. (2010). Sugar Levels Regulate Tryptophan-  
811 Dependent Auxin Biosynthesis in Developing Maize Kernels . *Plant Physiol* 153:306–318.



- 812 Leivar, P., Monte, E., Oka, Y., Liu, T., Carle, C., Castillon, A., Huq, E., and Quail, P. H. (2008).  
813 Multiple Phytochrome-Interacting bHLH Transcription Factors Repress Premature Seedling  
814 Photomorphogenesis in Darkness. *Curr Biol* 18:1815–1823.
- 815 Leivar, P., Tepperman, J. M., Cohn, M. M., Monte, E., Al-Sady, B., Erickson, E., and Quail, P. H.  
816 (2012). Dynamic Antagonism between Phytochromes and PIF Family Basic Helix-Loop-Helix  
817 Factors Induces Selective Reciprocal Responses to Light and Shade in a Rapidly Responsive  
818 Transcriptional Network in Arabidopsis. *Plant Cell* 24:1398–1419.
- 819 Li, L., and Sheen, J. (2016). Dynamic and diverse sugar signaling. *Curr Opin Plant Biol* 33:116–  
820 125.
- 821 Li, Y., Pi, L., Huang, H., and Xu, L. (2012). ATH1 and KNAT2 proteins act together in regulation  
822 of plant inflorescence architecture. *J Exp Bot* 63:1423–1433.
- 823 Li, X., Cai, W., Liu, Y., Li, H., Fu, L., Liu, Z., Xu, L., Liu, H., Xu, T., and Xiong, Y. (2017).  
824 Differential TOR activation and cell proliferation in Arabidopsis root and shoot apices. *Proc*  
825 *National Acad Sci* 114:2765–2770.
- 826 Liu, M., Wu, S., Chen, H., and Wu, S. (2012). Widespread translational control contributes to the  
827 regulation of Arabidopsis photomorphogenesis. *Mol Syst Biol* 8:566–566.
- 828 Livak, K. J., and Schmittgen, T. D. (2001). Analysis of Relative Gene Expression Data Using  
829 Real-Time Quantitative PCR and the  $2^{-\Delta\Delta C_T}$  Method. *Methods* 25:402–408.
- 830 López-Juez, E., Dillon, E., Magyar, Z., Khan, S., Hazeldine, S., Jager, S. M. de, Murray, J. A. H.,  
831 Beemster, G. T. S., Bögre, L., and Shanahan, H. (2008). Distinct Light-Initiated Gene  
832 Expression and Cell Cycle Programs in the Shoot Apex and Cotyledons of Arabidopsis . *Plant*  
833 *Cell* 20:947–968.
- 834 Ma, D., Li, X., Guo, Y., Chu, J., Fang, S., Yan, C., Noel, J. P., and Liu, H. (2016). Cryptochrome  
835 1 interacts with PIF4 to regulate high temperature-mediated hypocotyl elongation in response  
836 to blue light. *Proc National Acad Sci* 113:224–229.
- 837 Mazzella, M. A., Bertero, D., and Casal, J. J. (2000). Temperature-dependent internode elongation  
838 in vegetative plants of Arabidopsis thaliana lacking phytochrome B and cryptochrome 1. *Planta*  
839 210:497–501.
- 840 McNellis, T. W., Arnim, A. G. von, Araki, T., Komeda, Y., Miséra, S., and Deng, X. W. (1994).  
841 Genetic and molecular analysis of an allelic series of cop1 mutants suggests functional roles  
842 for the multiple protein domains. *Plant Cell* 6:487–500.
- 843 Menand, B., Desnos, T., Nussaume, L., Berger, F., Bouchez, D., Meyer, C., and Robaglia, C.  
844 (2002). Expression and disruption of the Arabidopsis TOR (target of rapamycin) gene. *Proc*  
845 *National Acad Sci* 99:6422–6427.

- 846 Mendiburu, F. de (2020). Statistical Procedures for Agricultural Research Package “agricolae”  
847 (1.3-3). The R Project for Statistical Computing. <https://cran.r-project.org/package=agricolae>  
848 Advance Access published 2020.
- 849 Mohammed, B., Bilooei, S. F., Dóczy, R., Grove, E., Railo, S., Palme, K., Ditengou, F. A., Bögre,  
850 L., and López-Juez, E. (2017). Converging Light, Energy and Hormonal Signaling Control  
851 Meristem Activity, Leaf Initiation, and Growth . *Plant Physiol* 176:1365–1381.
- 852 Montané, M.-H., and Menand, B. (2013). ATP-competitive mTOR kinase inhibitors delay plant  
853 growth by triggering early differentiation of meristematic cells but no developmental patterning  
854 change. *J Exp Bot* 64:4361–4374.
- 855 Muramoto, T., Kohchi, T., Yokota, A., Hwang, I., and Goodman, H. M. (1999). The Arabidopsis  
856 Photomorphogenic Mutant *hyl* Is Deficient in Phytochrome Chromophore Biosynthesis as a  
857 Result of a Mutation in a Plastid Heme Oxygenase. *Plant Cell* 11:335–347.
- 858 Patil, I. (2021). Visualizations with statistical details: The “ggstatsplot” approach. *J Open Source*  
859 *Softw* 6:3167.
- 860 Pedmale, U. V., Huang, S. C., Zander, M., Cole, B. J., Hetzel, J., Ljung, K., Reis, P. A. B., Sridevi,  
861 P., Nito, K., Nery, J. R., et al. (2016). Cryptochromes Interact Directly with PIFs to Control  
862 Plant Growth in Limiting Blue Light. *Cell* 164:233–245.
- 863 Peterson, R. L., and Yeung, E. C. (1972). Effect of Two Gibberellins on Species of the Rosette  
864 Plant *Hieracium*. *Bot Gaz* 133:190–198.
- 865 Pfeiffer, A., Janocha, D., Dong, Y., Medzihradzsky, A., Schöne, S., Daum, G., Suzaki, T., Forner,  
866 J., Langenecker, T., Rempel, E., et al. (2016). Integration of light and metabolic signals for  
867 stem cell activation at the shoot apical meristem. *Elife* 5:e17023.
- 868 Pham, V. N., Kathare, P. K., and Huq, E. (2018a). Dynamic regulation of PIF5 by COP1–SPA  
869 complex to optimize photomorphogenesis in Arabidopsis. *Plant J* 96:260–273.
- 870 Pham, V. N., Kathare, P. K., and Huq, E. (2018b). Phytochromes and Phytochrome Interacting  
871 Factors. *Plant Physiol* 176:1025–1038.
- 872 Pham, V. N., Xu, X., and Huq, E. (2018c). Molecular bases for the constitutive photomorphogenic  
873 phenotypes in Arabidopsis. *Development* 145:dev169870.
- 874 Ponnu, J., and Hoecker, U. (2021). Illuminating the COP1/SPA Ubiquitin Ligase: Fresh Insights  
875 Into Its Structure and Functions During Plant Photomorphogenesis. *Front Plant Sci* 12:662793.
- 876 Proveniers, M., Rutjens, B., Brand, M., and Smeekens, S. (2007). The Arabidopsis TALE  
877 homeobox gene *ATH1* controls floral competency through positive regulation of *FLC*. *Plant J*  
878 52:899–913.

- 879 Quaedvlieg, N., Dockx, J., Rook, F., Weisbeek, P., and Smeekens, S. (1995). The homeobox gene  
880 ATH1 of Arabidopsis is derepressed in the photomorphogenic mutants cop1 and det1. *Plant*  
881 *Cell* 7:117–129.
- 882 Rabot, A., Henry, C., Baaziz, K. B., Mortreau, E., Azri, W., Lothier, J., Hamama, L., Boummaza,  
883 R., Leduc, N., Pelleschi-Travier, S., et al. (2012). Insight into the Role of Sugars in Bud Burst  
884 Under Light in the Rose. *Plant Cell Physiol* 53:1068–1082.
- 885 Reed, J. W., Nagpal, P., Poole, D. S., Furuya, M., and Chory, J. (1993). Mutations in the gene for  
886 the red/far-red light receptor phytochrome B alter cell elongation and physiological responses  
887 throughout Arabidopsis development. *Plant Cell* 5:147–157.
- 888 Roldán, M., Gómez-Mena, C., Ruiz-García, L., Salinas, J., and Martínez-Zapater, J. M. (1999).  
889 Sucrose availability on the aerial part of the plant promotes morphogenesis and flowering of  
890 Arabidopsis in the dark. *Plant J* 20:581–590.
- 891 Rutjens, B., Bao, D., Eck-Stouten, E. V., Brand, M., Smeekens, S., and Proveniers, M. (2009).  
892 Shoot apical meristem function in Arabidopsis requires the combined activities of three BEL1-  
893 like homeodomain proteins. *Plant J* 58:641–654.
- 894 Sachs, R. M., Bretz, C. F., and Lang, A. (1959). SHOOT HISTOGENESIS: THE EARLY  
895 EFFECTS OF GIBBERELLIN UPON STEM ELONGATION IN TWO ROSETTE PLANTS.  
896 *Am J Bot* 46:376–384.
- 897 Sairanen, I., Novák, O., Pěnčík, A., Ikeda, Y., Jones, B., Sandberg, G., and Ljung, K. (2012).  
898 Soluble Carbohydrates Regulate Auxin Biosynthesis via PIF Proteins in Arabidopsis . *Plant*  
899 *Cell* 24:4907–4916.
- 900 Schaffer, W. M., and Schaffer, M. V. (1979). The Adaptive Significance of Variations in  
901 Reproductive Habit in the Agavaceae II: Pollinator Foraging Behavior and Selection for  
902 Increased Reproductive Expenditure. *Ecology* 60:1051–1069.
- 903 Schepetilnikov, M., and Ryabova, L. A. (2017). Recent Discoveries on the Role of TOR (Target  
904 of Rapamycin) Signaling in Translation in Plants. *Plant Physiol* 176:1095–1105.
- 905 Schepetilnikov, M., Makarian, J., Srour, O., Geldreich, A., Yang, Z., Chicher, J., Hammann, P.,  
906 and Ryabova, L. A. (2017). GTPase ROP2 binds and promotes activation of target of  
907 rapamycin, TOR, in response to auxin. *Embo J* 36:886–903.
- 908 Schlichting, Carl. D. (1986). The evolution of phenotypic plasticity in plants. *Ann. Rev. of Ecol.*  
909 *Syst* 17:667–693.
- 910 Schlichting, C. D., and Levin, D. A. (1986). Phenotypic plasticity: an evolving plant character.  
911 *Biol J Linn Soc* 29:37–47.

- 912 Schneider, C. A., Rasband, W. S., and Eliceiri, K. W. (2012). NIH Image to ImageJ: 25 years of  
913 image analysis. *Nat Methods* 9:671–675.
- 914 Serrano-Mislata, A., Bencivenga, S., Bush, M., Schiessl, K., Boden, S., and Sablowski, R. (2017).  
915 DELLA genes restrict inflorescence meristem function independently of plant height. *Nat*  
916 *Plants* 3:749–754.
- 917 Shalitin, D., Yang, H., Mockler, T. C., Maymon, M., Guo, H., Whitelam, G. C., and Lin, C. (2002).  
918 Regulation of Arabidopsis cryptochrome 2 by blue-light-dependent phosphorylation. *Nature*  
919 417:763–767.
- 920 Strasser, B., Sánchez-Lamas, M., Yanovsky, M. J., Casal, J. J., and Cerdán, P. D. (2010).  
921 Arabidopsis thaliana life without phytochromes. *Proc National Acad Sci* 107:4776–4781.
- 922 Thomson, F. J., Moles, A. T., Auld, T. D., and Kingsford, R. T. (2011). Seed dispersal distance is  
923 more strongly correlated with plant height than with seed mass. *J Ecol* 99:1299–1307.
- 924 Todaka, D., Nakashima, K., Maruyama, K., Kidokoro, S., Osakabe, Y., Ito, Y., Matsukura, S.,  
925 Fujita, Y., Yoshiwara, K., Ohme-Takagi, M., et al. (2012). Rice phytochrome-interacting  
926 factor-like protein OsPIL1 functions as a key regulator of internode elongation and induces a  
927 morphological response to drought stress. *Proc National Acad Sci* 109:15947–15952.
- 928 Ursache, R., Andersen, T. G., Marhavý, P., and Geldner, N. (2018). A protocol for combining  
929 fluorescent proteins with histological stains for diverse cell wall components. *Plant J* 93:399–  
930 412.
- 931 Vaughan, J. G. (1955). The morphology and growth of the vegetative and reproductive apices of  
932 Arabidopsis thaliana (L.) Heynh., Capsella bursa-pastoris (L.) Medic. and Anagallis arvensis  
933 L. *J Linn Soc Lond Botany* 55:279–301.
- 934 Whitelam, G. C., and Devlin, P. F. (1997). Roles of different phytochromes in Arabidopsis  
935 photomorphogenesis. *Plant Cell Environ* 20:752–758.
- 936 Whitelam, G. C., Patel, S., and Devlin, P. F. (1998). Phytochromes and photomorphogenesis in  
937 Arabidopsis. *Philosophical Transactions Royal Soc Lond Ser B Biological Sci* 353:1445–1453.
- 938 Wu, Q., Kuang, K., Lyu, M., Zhao, Y., Li, Y., Li, J., Pan, Y., Shi, H., and Zhong, S. (2020).  
939 Allosteric deactivation of PIFs and EIN3 by microproteins in light control of plant  
940 development. *Proc National Acad Sci* 117:18858–18868.
- 941 Xiong, Y., McCormack, M., Li, L., Hall, Q., Xiang, C., and Sheen, J. (2013). Glucose–TOR  
942 signalling reprograms the transcriptome and activates meristems. *Nature* 496:181–186.
- 943 Xu, X., Paik, I., Zhu, L., Bu, Q., Huang, X., Deng, X. W., and Huq, E. (2014). PHYTOCHROME  
944 INTERACTING FACTOR1 Enhances the E3 Ligase Activity of CONSTITUTIVE

945 PHOTOMORPHOGENIC1 to Synergistically Repress Photomorphogenesis in Arabidopsis .  
946 *Plant Cell* 26:1992–2006.

947 Zhang, B., Holmlund, M., Lorrain, S., Norberg, M., Bakó, L., Fankhauser, C., and Nilsson, O.  
948 (2017). BLADE-ON-PETIOLE proteins act in an E3 ubiquitin ligase complex to regulate  
949 PHYTOCHROME INTERACTING FACTOR 4 abundance. *Elife* 6:e26759.

950

951

952

953

954

955

956

957

958

959

960

961

962

963

964

965

966

967

968

969

970

971

972

973

974

975

976

977 **Figure legends**

978

979 **Figure 1: *ATH1* expression is sufficient to restore compact rosette growth in dark-grown**  
980 ***Arabidopsis* plants**

981 **A:** Average rosette internode elongation in dark-grown Col-8, *ath1-3*, and *35Spro:ATH1-HBD*  
982 plants treated with 0.1% ethanol (mock) or 10  $\mu$ M dexamethasone (Dex). Sucrose was added three  
983 days after the start of the experiment.

984 **B:** Representative three-week-old, dark-grown plants used in A. Arrows indicate elongated rosette  
985 internodes, the arrowhead indicates suppression of internode elongation. Scale bars denote 2 mm.

986 **C:** Relative expression of *ATH1* in Col-8 plants grown for either five, ten, or fifteen days (d) in  
987 continuous light or continuous darkness at 22°C. Sucrose was present at a one percent final  
988 concentration from the beginning of the experiment. Transcript levels were normalized to *MUSE3*  
989 (AT5G15400). The average of three biological replicates is shown. Error bars represent standard  
990 deviation of the  $\Delta$ CT mean. P-values indicate significant differences; p-value < 0.05, p-value <  
991 0.01, and p-value < 0.001 are represented by “\*”, “\*\*”, “\*\*\*” respectively.

992 **D:** Relative expression of *ATH1* in seven-day-old seedlings grown in continuous light (+) or  
993 continuous darkness (-) in the presence (+) or absence (-) of one percent sucrose. Transcript levels  
994 were normalized to *GAPC2* (AT1G13440). The average of three biological replicates is shown.  
995 The p-value for the observed difference is depicted in the figure.

996 **E:** GUS-stained seven-day-old, dark-grown *ATH1pro:GUS* seedlings in the absence (0%) or  
997 presence (0.5% and 1%) of sucrose. GUS activity is visible as a blue precipitate. Scale bars  
998 represent 0.01 mm.

999 **F:** Average rosette internode elongation in three-week-old dark-grown Col-8 and *35Spro:ATH1-*  
1000 *HBD* plants treated with increasing concentrations of Dex (0 nM to 10  $\mu$ M).

1001 **G:** Average rosette internode elongation of three-week-old dark-grown Col-8 and *ath1-4* seedlings  
1002 treated with increasing concentrations of sucrose (0.5 to 2.5%).

1003 In **A** and **G**: Different letters indicate statistically significant differences (P< 0.05) as determined  
1004 by one-way analysis of variance with Tukey’s honest significant difference post hoc test. In **A**: The  
1005 p-value for the observed difference in *35Spro:ATH1-HBD* (mock and Dex) is depicted in the  
1006 figure. In **A**, **F**, **G**: colored dots indicate rosette internode elongation scores of individual  
1007 seedlings.



1008 **Figure 2: Sugar-induced dark-grown seedlings display a SAM morphology similar to light-**  
1009 **grown *ath1* mutants**

1010 Median longitudinal optical sections through the shoot apical meristems of five-day-old Col-8 (**A**,  
1011 **B**), *ath1-4* (**C**), and *35Spro:ATH1-HBD* (**D**, **E**) seedlings grown at 27°C in the presence (**A**, **C**) or  
1012 absence (**B**, **D**, **E**) of light. Mock treatment (**D**) is 0.1% ethanol, Dex treatment (**E**) is 10 µM  
1013 dexamethasone. Cells marked in red form a central cell file extending from the epidermis into the  
1014 subapical region that forms the rib zone. Scale bars represent 10 µm. **F**: Quantification of cell  
1015 lengths as illustrated in **A-E**. Individual cell lengths were measured per position in apical-basal  
1016 direction. Per genotype and condition four or five individual apices were analyzed. The numbers  
1017 on the x-axis correspond to the cell position as depicted in **A-E**.

1018  
1019 **Figure 3: Significant reduction in *ATH1* expression levels underlies loss of rosette habit in**  
1020 **photoreceptor mutants**

1021 **A**: Expression of *ATH1* in seven-day-old seedlings (*Ler*) grown in SD white light (WL), red (RL),  
1022 blue (BL), far-red light (FRL) or continuous darkness (DRK). Transcript levels were normalized  
1023 to *GAPC2* (AT1G13440). Dots indicate the average values of four biological replicates per light  
1024 treatment, each consisting of 40-50 seedlings.

1025 **B**: Shoot apices of GUS-stained, seven-day-old *ATH1<sub>pro</sub>:GUS* seedlings in different genetic  
1026 backgrounds (*Col-8*, *phyB*, *phyBcry1*, and *phyBDE*). Plants were grown in white light under short-  
1027 day conditions. Scale bars represent 0.01 mm.

1028 **C**: Heat map generated from qPCR data on relative *ATH1* expression in indicated photoreceptor  
1029 mutants (see **Figure S1**), when compared to wild-type control plants (*Ler*). Transcript levels were  
1030 normalized to *GAPC2* (AT1G13440; BL) or *MUSE3* (AT5G15400; RL, FRL and WL). The  
1031 average of three biological replicates is shown. At least 20 shoot apices were used for each  
1032 biological replicate. Red corresponds to high relative expression and dark blue corresponds to low  
1033 relative expression. A linear fold change scale is displayed on top.

1034 **D**: Average rosette internode elongation in WT (*Ler*), *phyB*, *phyBcry1*, *hylcry1*, and  
1035 *hylcry1cry2* in the absence or presence of a *Pro35S:HA-ATH1* transgene. Plants were grown under  
1036 LD conditions. Different letters denote statistically significant differences between groups ( $P <$   
1037 0.05) as determined by 1-way ANOVA followed by Tukey's post hoc test. Colored dots indicate  
1038 the average rosette internode length per individual ( $n \geq 16$  individual plants per genotype).

1039 **E:** Representative plants from **D**. Arrows indicate elongated rosette internodes, the arrowheads  
1040 indicate complete suppression of internode elongation. Scale bars represent 5 mm.

1041  
1042 **Figure 4: Derepression of *ATH1* contributes to a compact rosette habit in dark-grown *cop1***  
1043 **mutants**

1044 **A:** Relative mRNA abundance of *ATH1* in shoot apices of two-week-old dark-grown seedlings.  
1045 The average of three biological replicates is shown. At least 20 shoot apices were used for each  
1046 biological replicate. The p-value of significant differences, as determined by the two-tailed  
1047 Student's t-test, are indicated in the figure.

1048 **B:** Average rosette internode lengths of 3-week-old Col-8, *ath1-4*, *cop1-4*, and *cop-1 ath1-4* plants  
1049 ( $n \geq 13$ ) grown in continuous darkness for three weeks at 22°C, in the presence of one percent  
1050 sucrose.

1051 The significant differences are indicated in the figure as determined by Pairwise test Games-  
1052 Howell according to R package ggstatsplot (Patil, 2021).

1053 **C:** Representative plants from **B**. Arrows indicate elongated rosette internodes, arrowheads  
1054 indicate complete suppression of internode elongation. Scale bars represent 0.5 mm.

1055 Sucrose (Suc +) or sorbitol (Suc -), both to a final concentration of one percent, were added three  
1056 days after start of the experiment (**A**, **C**)

1057  
1058 **Figure 5: A double-negative feedback loop between *ATH1* and PIFs is required for initiation**  
1059 **and maintenance of rosette growth habit**

1060 **A:** Average internode lengths of 3-week-old Col-8, *pif3*, *pif4*, *pif7*, *pif1pif3*, *pif3pif4*, *pif4pif5*,  
1061 *pif1pif3pif4*, *pif1pif3pif5*, *pif3pif4pif5*, and *pifq* (*pif1pif3pif4pif5*) plants grown in continuous  
1062 darkness at 22°C. Sucrose was added to the medium to a final concentration of one percent three  
1063 days after the start of the experiment. Colored dots indicate average rosette internode elongation  
1064 scores of individual seedlings ( $n \geq 9$ ). The p-value of significant differences compared to wild type  
1065 Col-8, as determined by the two-tailed Student's t-test, are indicated in the figure.

1066 **B:** Relative mRNA abundance of *ATH1* in SAM-enriched tissue of 14-day-old, dark-grown Col-  
1067 8, *pif4*, and *pifq* seedlings ( $n \geq 20$  per biological replicate; four biological replicates). Transcript  
1068 levels were normalized to *GAPC2* (AT1G13440). The p-value of significant differences, as

1069 determined by the two-tailed Student's t-test, are indicated in the figure. Sucrose was present at a  
1070 one percent final concentration from the start of the experiment.

1071 **C:** Average internode lengths of three-week-old Col-8, *pif4*, *pifq*, and *pifq ath1-3* plants grown in  
1072 continuous darkness at 22°C. Sucrose was added to the medium to a final concentration of one  
1073 percent three days after the start of the experiment. The p-value of significant differences, as  
1074 determined by the two-tailed Student's t-test, are indicated in the figure. Colored dots indicate  
1075 average rosette internode elongation scores of individual seedlings ( $n \geq 11$ ).

1076 **D, E:** Relative mRNA abundance of indicated *PIF* genes in SAM-enriched tissue of 14-day-old,  
1077 dark-grown Col-8 and *35Spro:ATH1-HBD* ( $n \geq 3$ ) (**D**) or 39-day-old, light-grown (SD conditions)  
1078 Col-8 and *ath1-3* seedlings ( $n \geq 2$ ) (**E**). For (**D**) seedlings were treated with a mock (0.1% ethanol,  
1079 Dex -) or 10  $\mu$ M dexamethasone (Dex +) at day three, and in total, 30-40 shoot apices were used  
1080 for each biological replicate (**D**). For light-grown plants (**E**), three shoot apices were used per  
1081 biological replicate. Transcript levels were normalized to *GAPC2* (AT1G13440). Seedlings were  
1082 treated with a mock (0.1% ethanol, Dex -) or 10  $\mu$ M dexamethasone (Dex +) (**D**). The p-value of  
1083 significant differences, as determined by the two-tailed Student's t-test, are indicated in the  
1084 figures.

1085

1086 **Figure 6: *ATH1* expression is independently regulated by light and sucrose**

1087 **A:** Schematic representation of the experimental setup. *ATH1<sub>pro</sub>:GUS* seeds were light-treated for  
1088 45 minutes to stimulate germination, before growth in continuous darkness for five days. AZD-  
1089 8055, lincomycin, norflurazon, or NaOH + CaO were then added and seedlings were grown for an  
1090 additional five hours in darkness before switching to *ATH1*-inducing conditions (continuous light  
1091 or continued growth in darkness in the presence of sucrose (Suc)) for two more days.

1092 **B:** Shoot apices of GUS-stained *ATH1<sub>pro</sub>:GUS* seedlings treated with either NaOH + CaO, 0.5 mM  
1093 lincomycin, or 5  $\mu$ M norflurazon according to the scheme depicted in (**A**). Mock-treatment was  
1094 with ethanol to a final concentration of 0.1%. Scale bars represent 0.05 mm.

1095 **C:** Relative expression of *ATH1* in seven-day-old, dark-grown seedlings, grown in the presence of  
1096 either sucrose, glucose, fructose, palatinose, or sorbitol, all at a final concentration of one percent  
1097 in the growth medium. Sugars were added at the start of the experiment. Transcript levels were  
1098 normalized to *MUSE3* (At5g15400). The average of three biological replicates is shown. At least  
1099 30 seedlings were used for each biological replicate.

1100 **D, E:** Shoot apices of GUS-stained *ATH1<sub>pro</sub>:GUS* seedlings treated with the TOR kinase inhibitor  
1101 AZD-8055 before switching to *ATH1*-inducing conditions (continuous light (**D**) or darkness in the  
1102 presence of one percent sucrose (**E**)) according to the scheme depicted in (**A**). Scale bars represent  
1103 0.01 mm.

1104 **F:** Relative expression of *ATH1* in seven-day-old, dark-grown *35S::ALCR alcA:RNAi-TOR* and  
1105 *35S::ALCR alcA:GUS* (control line) seedlings in the presence or absence of ethanol (ETOH; 0.1%)  
1106 and/or sucrose (Suc; 1%). Experimental setup was as in (**A**). ETOH was added after five days of  
1107 growth in darkness. After an additional five hours in darkness sucrose was added and plants were  
1108 sampled after two more days in darkness. Transcript levels were normalized to *GAPC2*  
1109 (AT1G13440). The average of three biological replicates is shown. At least 30 seedlings were used  
1110 for each biological replicate. Different letters denote statistically significant differences between  
1111 groups ( $P < 0.05$ ) as determined by 1-way ANOVA followed by Tukey's post hoc test.

1112

1113 **Figure 7: Light and sucrose signaling pathways converge at TOR kinase to control *ATH1***  
1114 **expression and subsequent rosette growth habit in *Arabidopsis thaliana*.**

1115 Expression of *ATH1* is mediated by the activity of TOR kinase in response to both sugar and light.  
1116 In response to light (**left panel**), photoreceptor signaling inhibits the activity of a COP1-containing  
1117 protein complex that acts as a central repressor of light signaling in darkness. This releases the  
1118 inhibitory effect of COP1 on TOR kinase. Activation of TOR kinase then leads to both activation  
1119 of the SAM and induction of *ATH1* expression in the SAM. As a consequence of *ATH1* expression  
1120 in the SAM, *PIF* gene expression, including *PIF4*, is locally inhibited. This contributes to  
1121 inhibition of rib zone activity and, consequently, suppression of rosette internode elongation with  
1122 the for *Arabidopsis* typical rosette growth habit as a result. As TOR kinase is a major regulator of  
1123 mRNA translation, the effect on *ATH1* expression is most likely indirect (dotted arrow). In the  
1124 absence of light (**right panel**), the COP1-complex is stabilized and inhibits TOR kinase activity  
1125 and subsequent SAM activation. In addition, the COP1-complex stabilizes PIFs in darkness to  
1126 positively regulate skotomorphogenesis. As a combined effect, *ATH1* is not expressed under these  
1127 conditions. Sucrose-availability to the SAM can substitute for light both in the case of SAM  
1128 activation and for *ATH1* induction. Although both processes are mediated through TOR kinase,  
1129 sucrose levels sufficient to activate the SAM only result in weak expression of *ATH1*, probably as  
1130 the result of still active COP1-PIF signaling. Resulting *ATH1* levels are insufficient to suppress

1131 rib zone activity. As a consequence, in most circumstances sugar-induced dark-grown seedlings  
1132 display a caulescent growth habit due to premature rib zone activation resulting in elongation of  
1133 vegetative internodes.

1134

1135 **Figure S1: Relative mRNA abundance of ATH1 in different photoreceptor mutants**

1136 **A-D:** Relative expression of *ATH1* in seven-day-old wild type (*Ler*) and indicated photoreceptor  
1137 mutants grown under SD conditions in the presence of white light (**A**), red light (**B**), blue light (**C**)  
1138 or far-red light (**D**). Transcript levels were normalized to *GAPC2* (AT1G13440) (BL) or *MUSE3*  
1139 (AT5G15400; WL, RL, and FRL). Data shown are the average of three biological replicates. At  
1140 least 30 seedlings were used for each biological replicate. Different letters denote statistically  
1141 significant differences between groups ( $P < 0.05$ ) as determined by 1-way ANOVA followed by  
1142 Tukey's post hoc test.

1143

1144 **Figure S2: Sugar-induced dark-grown seedlings phenocopy light-grown *ath1* mutants**

1145 Rosette elongation phenotypes of wild-type Col-8 (**A** and **B**) *ath1-4* (**C**), and *35Spro:ATH1-HBD*  
1146 (*ATH1-HBD*; **D** and **E**) plants grown in the presence (**A**, **C**) or absence (**B**, **D**, **E**) of light at 27°C.  
1147 *35Spro:ATH1-HBD* plants were treated either with a mock (0.1% ethanol, **D**) or 10 µM  
1148 dexamethasone (Dex, **E**). Dark-grown plants (**B**, **D**, **E**) were supplemented with sucrose to a final  
1149 concentration of one percent three days after the start of the experiment. Arrows indicate elongated  
1150 rosette internodes, the arrowhead indicates complete suppression of internode elongation.

1151 **F:** Average rosette internode lengths of plants depicted in **A-E**. Per genotype and treatment 10  
1152 individual plants were analyzed. Scale bars represent 5 mm.

1153

1154 **Figure S3: *ATH1<sub>pro</sub>:GUS* activity in seven-day-old seedlings grown in darkness in the  
1155 presence of different sugars**

1156 **A, B:** Quantification of GUS-staining intensity in *ATH1<sub>pro</sub>:GUS* shoot apices from **Figure 5B, E**.  
1157 Different letters denote statistically significant differences between groups ( $P < 0.05$ ) as  
1158 determined by 1-way ANOVA followed by Tukey's post hoc test.

1159 **C:** Shoot apices of GUS-stained *ATH1<sub>pro</sub>:GUS* seedlings grown in continuous darkness for seven  
1160 days. Plants were grown in the presence of either sucrose, glucose, fructose, palatinose, or sorbitol,

1161 all added to the growth medium to a final concentration of one percent at the start of the  
1162 experiment. Scale bars represent 0.05 mm.

1163

1164 **Figure S4: Effect of TOR inhibition on *ATH1* expression in *cop1-4* mutant seedlings.**

1165 Relative expression of *ATH1* in seven-day-old *cop1-4* mutants grown according to the  
1166 experimental setup indicated in **Figure 5A**. Seeds were light-treated for 45 minutes to stimulate  
1167 germination and then grown in continuous darkness for five days. Following the addition of AZD-  
1168 8055, the seedlings were grown for two more days in darkness before samples were taken.  
1169 Transcript levels were normalized to *MUSE3* (AT5G15400). The average of three (AZD-8055 -)  
1170 or four (AZD-8055 +) biological replicates is shown. At least 30 seedlings were used for each  
1171 biological replicate. The p-value of significant difference, as determined by the two-tailed  
1172 Student's t-test, is indicated in the figure.

1173



1174 **Figures**

1175

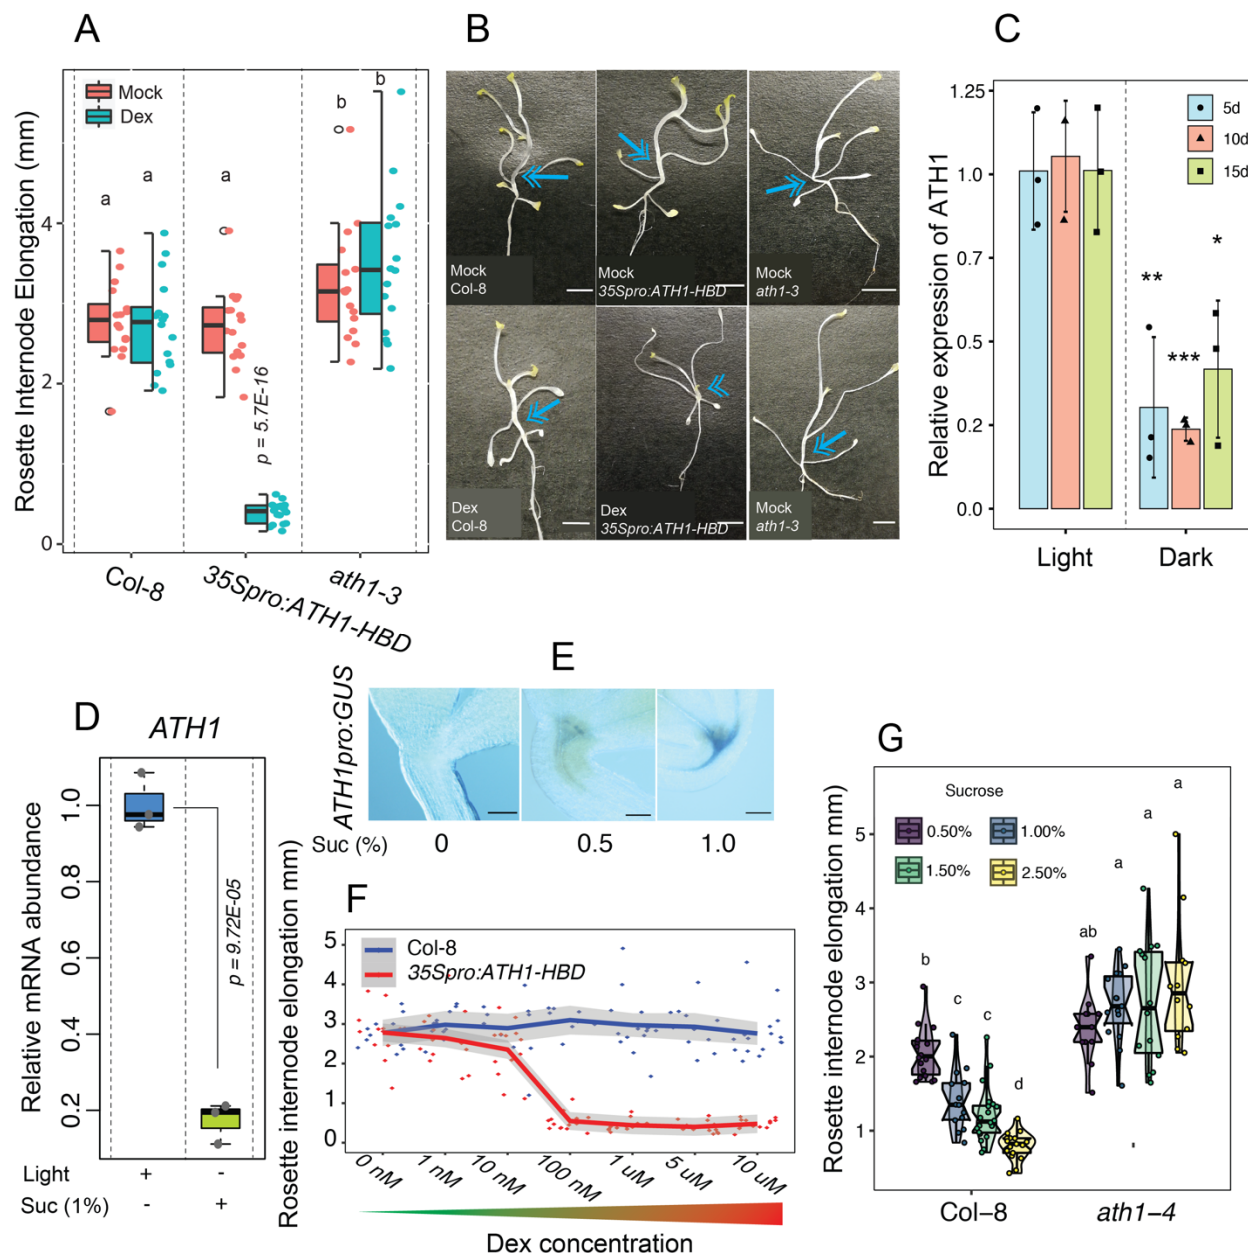

1176

1177 **Figure 1: *ATH1* expression is sufficient to restore compact rosette growth in dark-grown**  
 1178 **Arabidopsis plants**

1179 **A:** Average rosette internode elongation in dark-grown Col-8, *ath1-3*, and *35Spro:ATH1-HBD*  
 1180 plants treated with 0.1% ethanol (mock) or 10  $\mu$ M dexamethasone (Dex). Sucrose was added three  
 1181 days after the start of the experiment. **B:** Representative three-week-old, dark-grown plants used  
 1182 in A. Arrows indicate elongated rosette internodes, the arrowhead indicates suppression of  
 1183 internode elongation. Scale bars denote 2 mm. **C:** Relative expression of *ATH1* in Col-8 plants  
 1184 grown for either 5, 10, or 15 days (d) in continuous light or continuous darkness at 22°C. Sucrose  
 1185 was present at a one percent final concentration from the beginning of the experiment. Transcript

1186 levels were normalized to *MUSE3* (AT5G15400). The average of three biological replicates is  
1187 shown. Error bars represent standard deviation of the  $\Delta$ CT mean. p-values indicate significant  
1188 differences; p-value < 0.05, p-value < 0.01, and p-value < 0.001 are represented by “\*”, “\*\*”,  
1189 “\*\*\*” respectively. **D:** Relative expression of *ATH1* in seven-day-old seedlings grown in  
1190 continuous light (+) or continuous darkness (-) in the presence (+) or absence (-) of one percent  
1191 sucrose. Transcript levels were normalized to *GAPC2* (AT1G13440). The average of three  
1192 biological replicates is shown. The p-value for the observed difference is depicted in the figure.  
1193 **E:** GUS-stained 7-day-old, dark-grown *ATH1pro:GUS* seedlings in the absence (0%) or presence  
1194 (0.5% and 1%) of sucrose. GUS activity is visible as a blue precipitate. Scale bars represent 0.01  
1195 mm. **F:** Average rosette internode elongation in three-week-old dark-grown Col-8  
1196 and *35Spro:ATH1-HBD* plants treated with increasing concentrations of Dex (0 nM to 10  $\mu$ M). **G:**  
1197 Average rosette internode elongation of three-week-old dark-grown Col-8 and *ath1-4* seedlings  
1198 treated with increasing concentrations of sucrose (0.5 to 2.5%). In **A** and **G:** Different letters  
1199 indicate statistically significant differences ( $p < 0.05$ ) as determined by one-way analysis of  
1200 variance with Tukey’s honest significant difference post hoc test. In **A:** The p-value for the  
1201 observed difference in *35Spro:ATH1-HBD* (mock and Dex) is depicted in the figure. In **A, F, G:**  
1202 colored dots indicate rosette internode elongation scores of individual seedlings.  
1203  
1204  
1205

1206

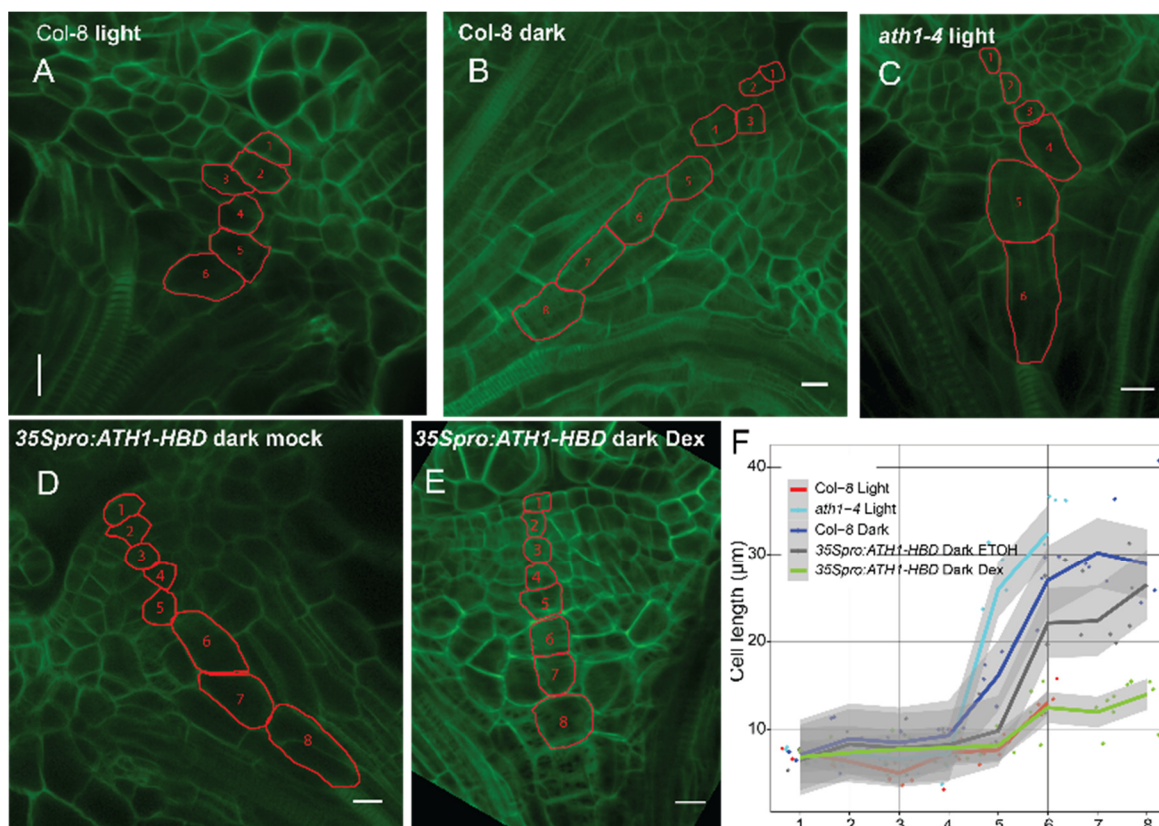

1207  
1208

1209 **Figure 2: Sugar-induced dark-grown seedlings display a SAM morphology similar to light-**  
1210 **grown *ath1* mutants**

1211 Median longitudinal optical sections through the shoot apical meristems of five-day-old Col-8 (A,  
1212 B), *ath1-4* (C), and *35Spro:ATH1-HBD* (D, E) seedlings grown at 27°C in the presence (A, C) or  
1213 absence (B, D, E) of light. Mock treatment (D) is 0.1% ethanol, Dex treatment (E) is 10 μM  
1214 dexamethasone. Cells marked in red form a central cell file extending from the epidermis into the  
1215 subapical region that forms the rib zone. Scale bars represent 10 μm. F: Quantification of cell  
1216 lengths as illustrated in A-E. Individual cell lengths were measured per position in apical-basal  
1217 direction. Per genotype and condition four or five individual apices were analyzed. The numbers  
1218 on the x-axis correspond to the cell position as depicted in A-E.

1219

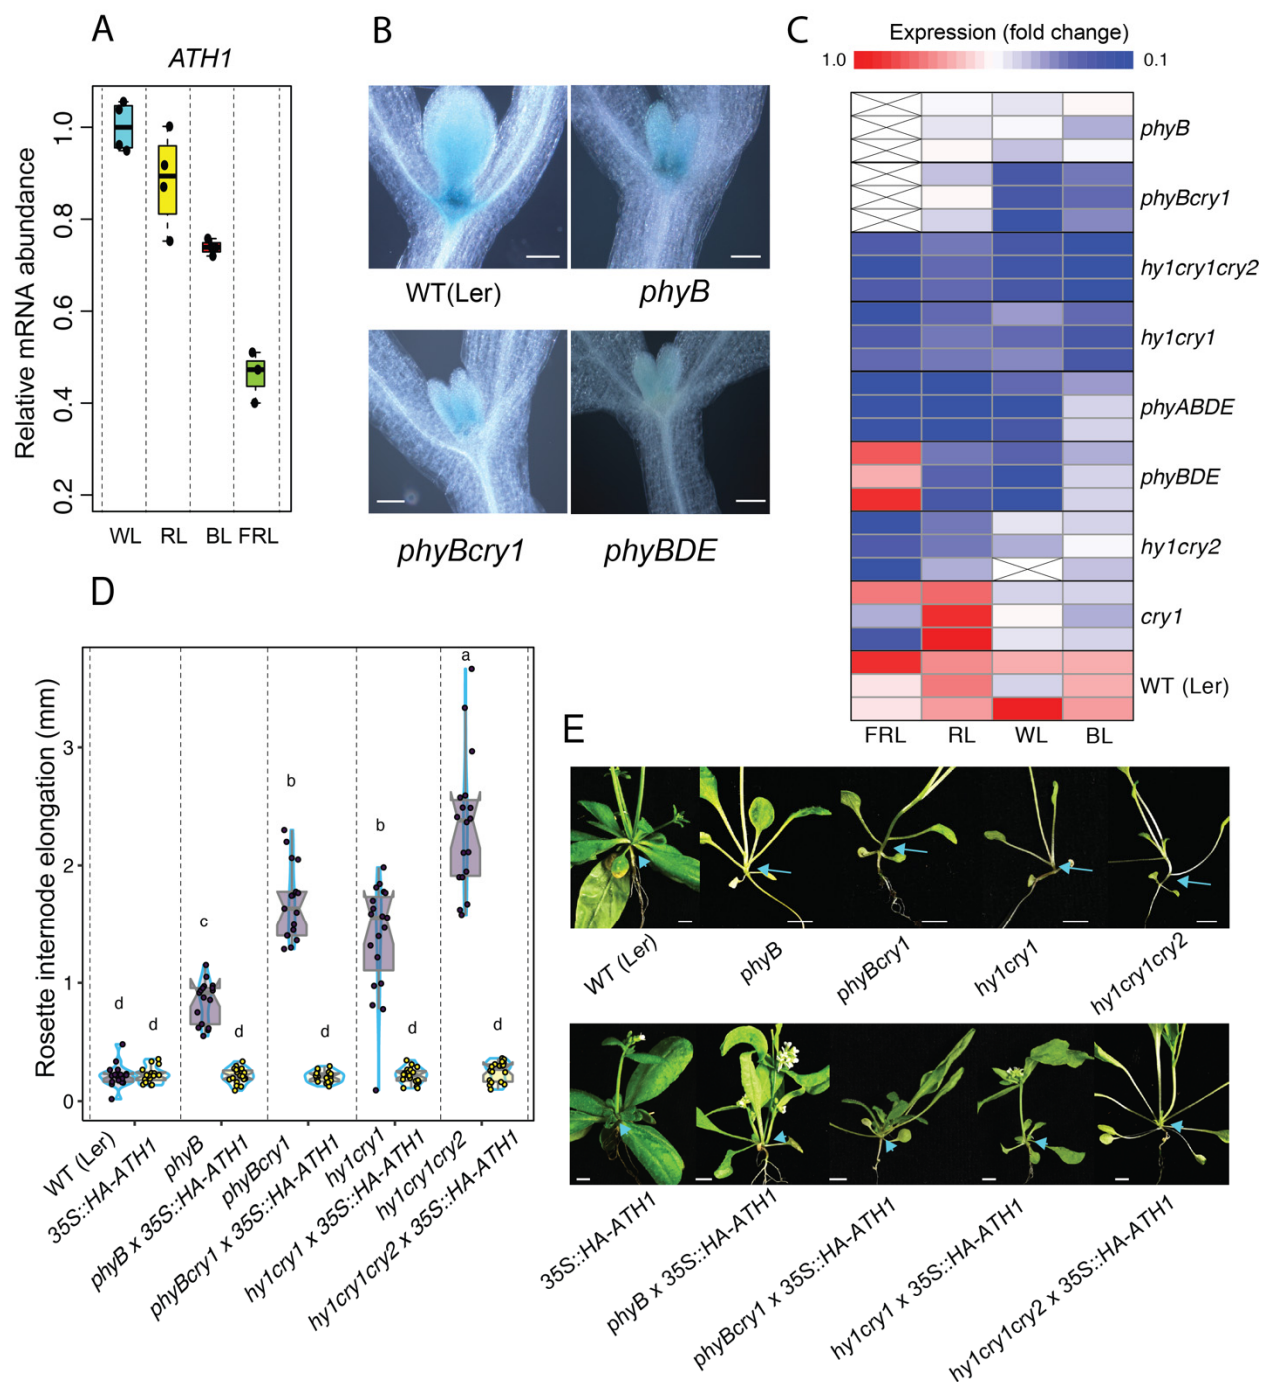

1220  
1221 **Figure 3: Significant reduction in *ATH1* expression levels underlies loss of rosette habit in**  
1222 **photoreceptor mutants**

1223 **A:** Expression of *ATH1* in seven-day-old seedlings (*Ler*) grown in SD white light (WL), red (RL),  
1224 blue (BL), far-red light (FRL), or continuous darkness (DRK). Transcript levels were normalized  
1225 to *GAPC2* (AT1G13440). Dots indicate the average values of four biological replicates per light  
1226 treatment, each consisting of 40-50 seedlings. **B:** Shoot apices of GUS-stained, seven-day-old  
1227 *ATH1<sub>pro</sub>::GUS* seedlings in different genetic backgrounds (Col-8, *phyB*, *phyBcry1*, and *phyBDE*).  
1228 Plants were grown in whit light under short-day conditions. Scale bars represent 0.01 mm. **C:** Heat



1229 map generated from qPCR data on relative *ATH1* expression in indicated photoreceptor mutants  
1230 (see **Figure S1**), when compared to wild-type control plants (*Ler*). Transcript levels were  
1231 normalized to *GAPC2* (AT1G13440; BL) or *MUSE3* (AT5G15400; RL, FRL and WL). The  
1232 average of three biological replicates is shown. At least 20 shoot apices were used for each  
1233 biological replicate. Red corresponds to high relative expression and dark blue corresponds to low  
1234 relative expression. A linear fold change scale is displayed on top. **D**: Average rosette internode  
1235 elongation in WT (*Ler*), *phyB*, *phyBcry1*, *hycry1*, and *hycry1cry2* in the absence or presence of  
1236 a *Pro35S:HA-ATH1* transgene. Plants were grown under LD conditions. Different letters denote  
1237 statistically significant differences between groups ( $p < 0.05$ ) as determined by 1-way ANOVA  
1238 followed by Tukey's post hoc test. Colored dots indicate the average rosette internode length per  
1239 individual ( $n \geq 16$  individual plants per genotype). **E**: Representative plants from **D**. Arrows  
1240 indicate elongated rosette internodes, the arrowheads indicate complete suppression of internode  
1241 elongation. Scale bars represent 5 mm.  
1242  
1243

1244

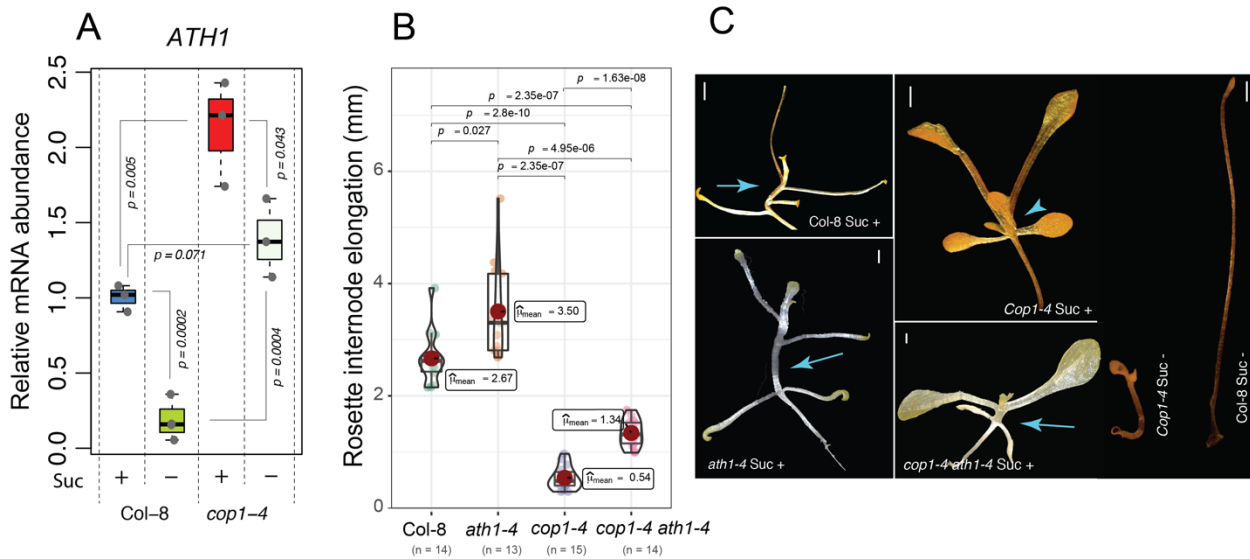

1245

1246

**Figure 4: Derepression of *ATH1* contributes to a compact rosette habit in dark-grown *cop1* mutants**

1247

1248

1249

1250

1251

1252

1253

1254

1255

1256

1257

1258

1259

1260

1261

1262

1263

1264

**A:** Relative mRNA abundance of *ATH1* in shoot apices of two-week-old dark-grown seedlings. The average of three biological replicates is shown. At least 20 shoot apices were used for each biological replicate. The p-value of significant differences, as determined by the two-tailed Student's t-test, are indicated in the figure. **B:** Average rosette internode lengths of three-week-old Col-8, *ath1-4*, *cop1-4*, and *cop1-4 ath1-4* plants ( $n \geq 13$ ) grown in continuous darkness for three weeks at 22°C, in the presence of one percent sucrose. The significant differences are indicated in the figure as determined by Pairwise test Games-Howell according to R package ggstatsplot (Patil, 2021). **C:** Representative plants from **B**. Arrows indicate elongated rosette internodes, the arrowhead indicates complete suppression of internode elongation. Scale bars represent 0.5 mm. Sucrose (Suc +) or sorbitol (Suc -), both to a final concentration of one percent, were added three days after start of the experiment (**A**, **C**)



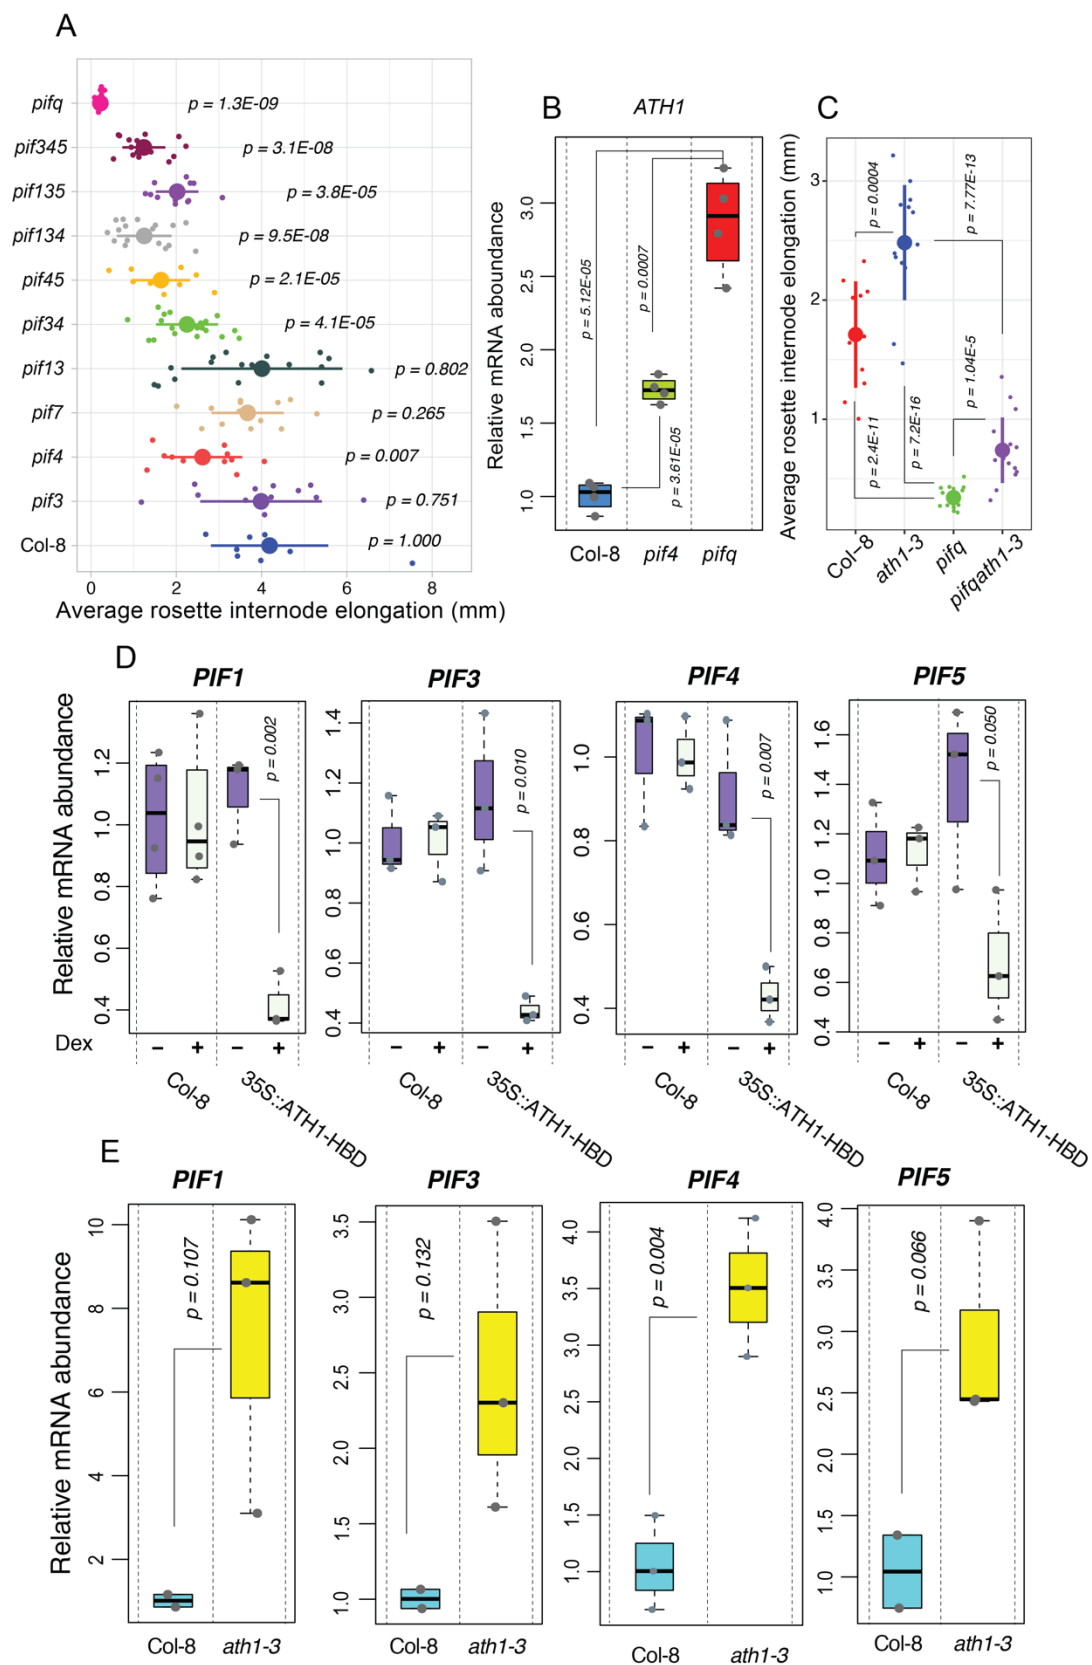

1266 **Figure 5: A double-negative feedback loop between ATH1 and PIFs is required for initiation**  
1267 **and maintenance of rosette growth habit**

1268 **A:** Average internode lengths of 3-week-old Col-8, *pif3*, *pif4*, *pif7*, *pif1pif3*, *pif3pif4*, *pif4pif5*,  
1269 *pif1pif3pif4*, *pif1pif3pif5*, *pif3pif4pif5*, and *pifq* (*pif1pif3pif4pif5*) plants grown in continuous  
1270 darkness at 22°C. Sucrose was added to the medium to a final concentration of one percent three  
1271 days after the start of the experiment. Colored dots indicate average rosette internode elongation  
1272 scores of individual seedlings ( $n \geq 9$ ). The p-value of significant differences compared to wild type  
1273 Col-8, as determined by the two-tailed Student's t-test, are indicated in the figure. **B:** Relative  
1274 mRNA abundance of *ATH1* in SAM-enriched tissue of 14-day-old, dark-grown Col-8, *pif4*,  
1275 and *pifq* seedlings ( $n \geq 20$  per biological replicate; four biological replicates). Transcript levels were  
1276 normalized to *GAPC2* (AT1G13440). The p-value of significant differences, as determined by the  
1277 two-tailed Student's t-test, are indicated in the figure. Sucrose was present at a one percent final  
1278 concentration from the start of the experiment. **C:** Average internode lengths of three-week-old  
1279 Col-8, *pif4*, *pifq*, and *pifq ath1-3* plants grown in continuous darkness at 22°C. Sucrose was added  
1280 to the medium to a final concentration of one percent three days after the start of the  
1281 experiment. The p-value of significant differences, as determined by the two-tailed Student's t-  
1282 test, are indicated in the figure. Colored dots indicate average rosette internode elongation scores  
1283 of individual seedlings ( $n \geq 11$ ). **D, E:** Relative mRNA abundance of indicated *PIF* genes in SAM-  
1284 enriched tissue of 14-day-old, dark-grown Col-8 and *35Spro:ATH1-HBD* ( $n \geq 3$ ) (**D**) or 39-day-  
1285 old, light-grown (SD conditions) Col-8 and *ath1-3* seedlings ( $n \geq 2$ ) (**E**). For (**D**) seedlings were  
1286 treated with a mock (0.1% ethanol, Dex -) or 10  $\mu$ M dexamethasone (Dex +) at day three, and in  
1287 total, 30-40 shoot apices were used for each biological replicate (**D**). For light-grown plants (**E**),  
1288 three shoot apices were used per biological replicate. Transcript levels were normalized to *GAPC2*  
1289 (AT1G13440). Seedlings were treated with a mock (0.1% ethanol, Dex -) or 10  $\mu$ M dexamethasone  
1290 (Dex +) (**D**). The p-value of significant differences, as determined by the two-tailed Student's t-  
1291 test, are indicated in the figures.

1292  
1293  
1294  
1295

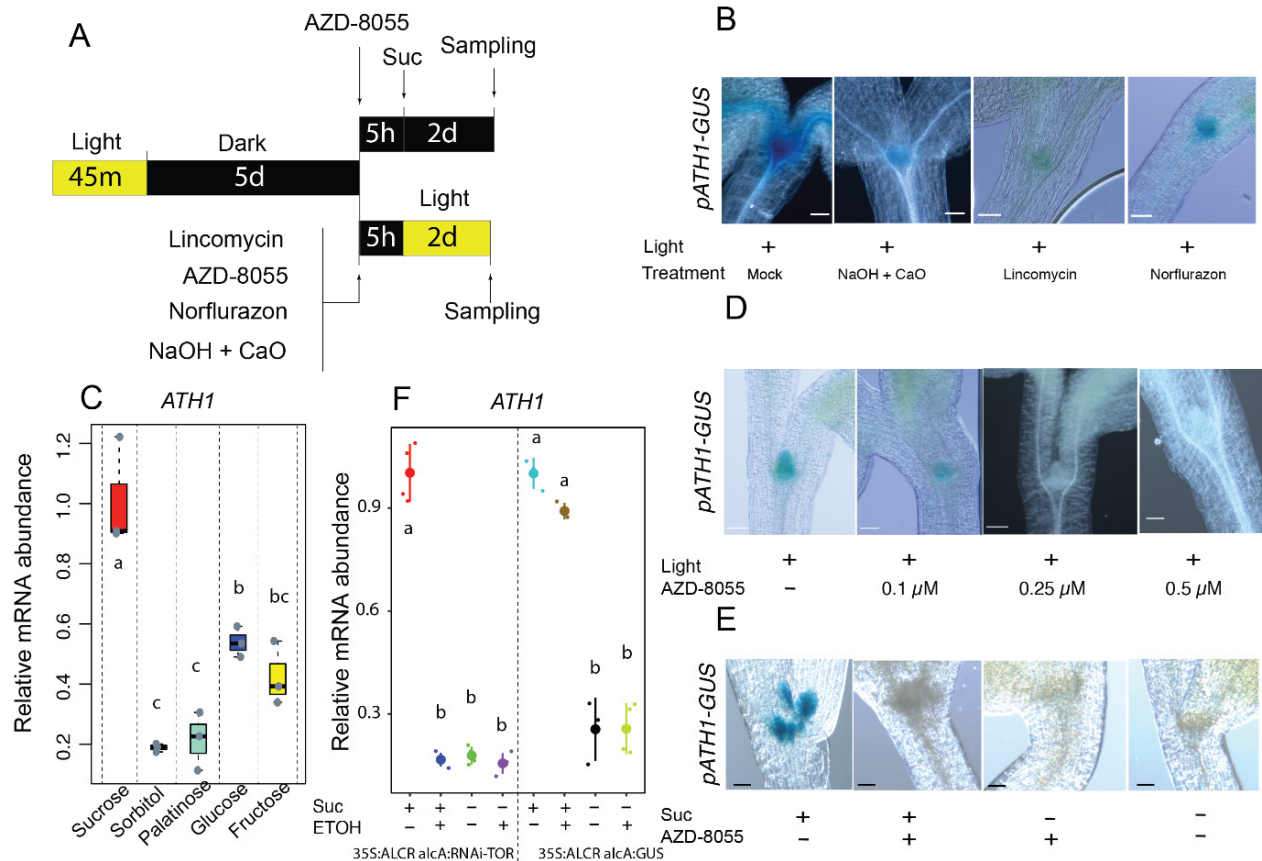

1296  
1297

1298 **Figure 6: *ATH1* expression is independently regulated by light and sucrose**

1299 **A:** Schematic representation of the experimental setup. *ATH1<sub>pro</sub>:GUS* seeds were light-treated for

1300 45 minutes to stimulate germination, before growth in continuous darkness for five days. AZD-

1301 8055, lincomycin, norflurazon, or NaOH + CaO were then added and seedlings were grown for an

1302 additional five hours in darkness before switching to *ATH1*-inducing conditions (continuous light

1303 or continued growth in darkness in the presence of sucrose (Suc)) for two more days. **B:** Shoot

1304 apices of GUS-stained *ATH1<sub>pro</sub>:GUS* seedlings treated with either NaOH + CaO, 0.5 mM

1305 lincomycin, or 5  $\mu$ M norflurazon according to the scheme depicted in (A). Mock-treatment was

1306 with ethanol to a final concentration of 0.1%. Scale bars represent 0.05 mm. **C:** Relative expression

1307 of *ATH1* in seven-day-old, dark-grown seedlings, grown in the presence of either sucrose, glucose,

1308 fructose, palatinose, or sorbitol, all at a final concentration of one percent in the growth medium.

1309 Sugars were added at the start of the experiment. Transcript levels were normalized to *MUSE3*

1310 (*At5g15400*). The average of three biological replicates is shown. At least 30 seedlings were used

1311 for each biological replicate. **D, E:** Shoot apices of GUS-stained *ATH1<sub>pro</sub>:GUS* seedlings treated

1312 with the TOR kinase inhibitor AZD-8055 before switching to *ATH1*-inducing conditions

1313 (continuous light (D) or darkness in the presence of one percent sucrose (E)) according to the

1314 scheme depicted in (A). Scale bars represent 0.01 mm. **F:** Relative expression of *ATH1* in seven-

1315 day-old, dark-grown *35S::ALCR alcA:RNAi-TOR* and *35S::ALCR alcA:GUS* (control line)

1316 seedlings in the presence or absence of ethanol (ETOH; 0.1%) and/or sucrose (Suc; 1%).

1317 Experimental setup was as in (A). ETOH was added after five days of growth in darkness. After

1318 an additional 5 hours in darkness sucrose was added and plants were sampled after two more days

1319 in darkness. Transcript levels were normalized to *GAPC2* (*AT1G13440*). The average of three

1320 biological replicates is shown. At least 30 seedlings were used for each biological replicate.  
1321 Different letters denote statistically significant differences between groups ( $p < 0.05$ ) as  
1322 determined by 1-way ANOVA followed by Tukey's post hoc test.  
1323  
1324

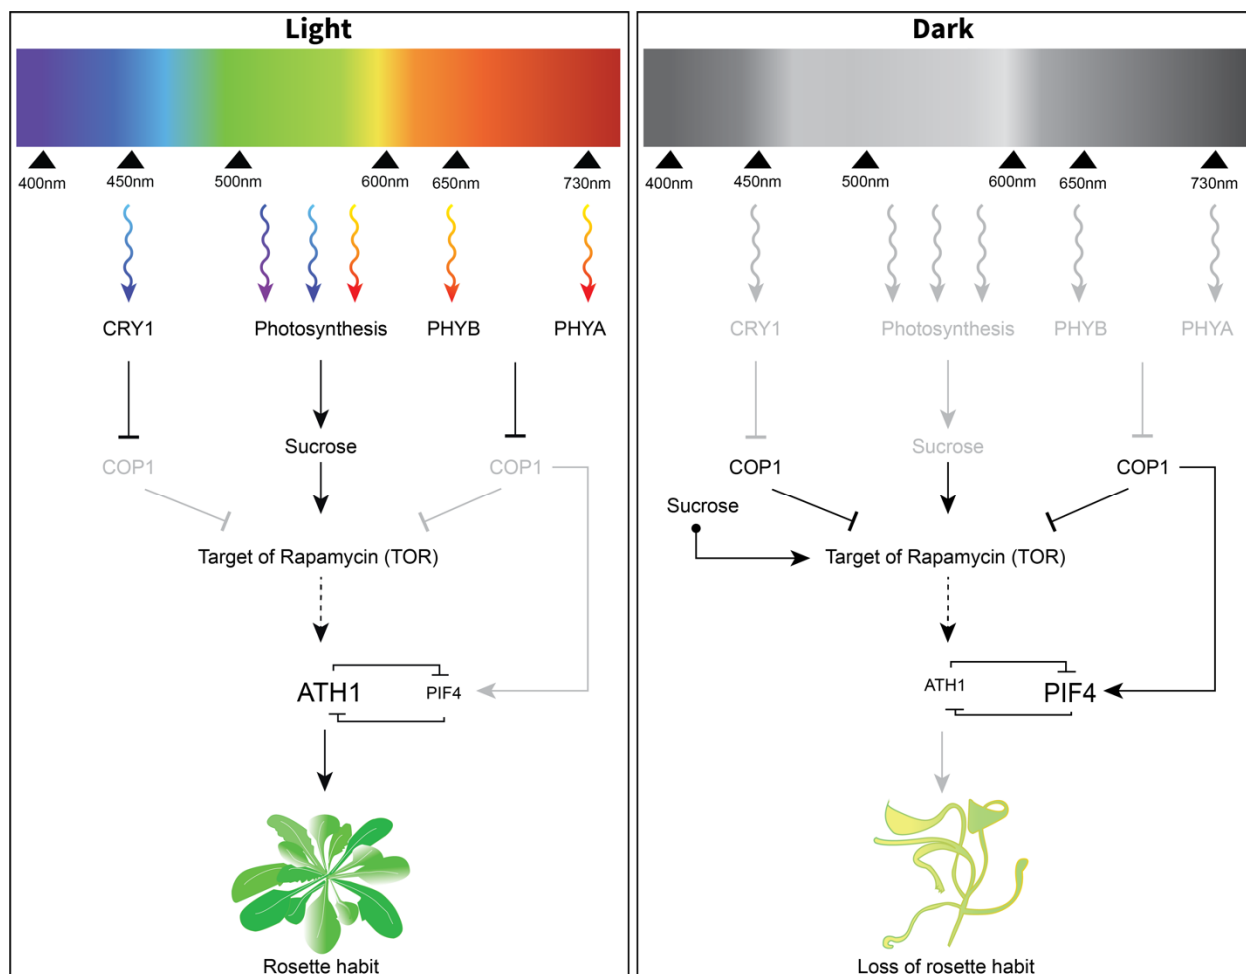

1325  
1326

1327 **Figure 7: Light and sucrose signaling pathways converge at TOR kinase to control *ATH1***  
1328 **expression and subsequent rosette growth habit in *Arabidopsis thaliana*.**

1329 Expression of *ATH1* is mediated by the activity of TOR kinase in response to both sugar and light.  
1330 In response to light (**left panel**), photoreceptor signaling inhibits the activity of a COP1-containing  
1331 protein complex that acts as a central repressor of light signaling in darkness. This releases the  
1332 inhibitory effect of COP1 on TOR kinase. Activation of TOR kinase then leads to both activation  
1333 of the SAM and induction of *ATH1* expression in the SAM. As a consequence of *ATH1* expression  
1334 in the SAM, *PIF* gene expression, including *PIF4*, is locally inhibited. This contributes to  
1335 inhibition of rib zone activity and, consequently, suppression of rosette internode elongation with  
1336 the for *Arabidopsis* typical rosette growth habit as a result. As TOR kinase is a major regulator of  
1337 mRNA translation, the effect on *ATH1* expression is most likely indirect (dotted arrow). In the  
1338 absence of light (**right panel**), the COP1-complex is stabilized and inhibits TOR kinase activity  
1339 and subsequent SAM activation. In addition, the COP1-complex stabilizes PIFs in darkness to  
1340 positively regulate skotomorphogenesis. As a combined effect, *ATH1* is not expressed under these  
1341 conditions. Sucrose-availability to the SAM can substitute for light both in the case of SAM  
1342 activation and for *ATH1* induction. Although both processes are mediated through TOR kinase,  
1343 sucrose levels sufficient to activate the SAM only result in weak expression of *ATH1*, probably as  
1344 the result of still active COP1-PIF signaling. Resulting *ATH1* levels are insufficient to suppress  
1345 rib zone activity. As a consequence, in most circumstances sugar-induced dark-grown seedlings

1346 display a caulescent growth habit due to premature rib zone activation resulting in elongation of  
1347 vegetative internodes.  
1348



1349 **Supplemental Information**

1350

1351 **Supplemental Table S1: Primers for qRT-PCR.**

1352

| Gene                    | Sequence Fw             | Sequence Rv               | Ref.                      |
|-------------------------|-------------------------|---------------------------|---------------------------|
| <i>ATH1</i> (AT4G32980) | CAACGAGGTTTGCCTGAGAAA   | TTCGGGTAAGGGTGAAGGAA      |                           |
| <i>PIF1</i> (AT2G20180) | TGAATCCCGTAGCGAGGAAACAA | TTCCACATCCCATTGACATCATCTG | (Xu et al., 2017)         |
| <i>PIF3</i> (AT1G09530) | CTGAAAGGAGACGGCGTGATAG  | CAGATAGTAACCAGACGCCATTGAC | (Zhong et al., 2012)      |
| <i>PIF4</i> (AT2G43010) | CAGCTTCAAGTGATGTGGATG   | CATAACCGGAAATCGAGGTAA     | (Qi et al., 2020)         |
| <i>PIF5</i> (AT3G59060) | CAACTCCAAGTGATGTGGATG   | CAATTGCATCTGACTTTGCAT     | (Qi et al., 2020)         |
| MUSE3 (AT5G15400)       | GGGCACTCAAGTATCTTGTTAGC | TGCTGCCCAACATCAGGTT       | (Pei et al., 2007)        |
| GAPC2 (AT1G13440)       | TTGGTGACAACAGGTCAAGCA   | AAACTTGTCGCTCAATGCAATC    | (Czechowski et al., 2005) |

1353

1354

1355 **Supplemental Table S2: Primers for genotyping.**

1356

| Gene                             | Left primer (LP)                              | Right primer (RP)                | Ref., & notes          |
|----------------------------------|-----------------------------------------------|----------------------------------|------------------------|
| <i>pij1-1</i><br>(SAIL_256_G07)  | LP: AAGGAAGGAGGAGGAATAGGC                     | RP: CATGAATTTCTCGAGGCTGAG        | (Sparks et al., 2016)  |
|                                  | LB:<br>GCTTCCTATTATATCTTCCCAAATTACCAATA<br>CA |                                  |                        |
| <i>pij3-7</i>                    | A: GGTCACCATGCTCCAACCTCT                      | B: CCTGAGAAAGTAGGCGGAGA          | 1                      |
|                                  | C: TCTCCGCTACTTTCTCAGG                        | D: TGTTGCGTTTTACAGAAACAATC       |                        |
| <i>pij3-1</i><br>(SALK_030753)   | LP: AGTCTGTTGCTTCTGCTACGC                     | RP: TTGCATAAGGCATTCCCATAC        |                        |
|                                  | LB: ATTTTGCCGATTTTCGGAAC                      |                                  |                        |
| <i>pij4-2</i><br>(SAIL_1288_E07) | LP:<br>ACCTCCTCAAGTCATGGTTAAGCCTAAGCC         | RP: TCCAAACGAGAACCGTCGGT         | (Leivar et al., 2008b) |
|                                  | LB:<br>TAGCATCTGAATTTTCATAACCAATCTCGATAAC     |                                  |                        |
| <i>pij5-3</i><br>(SALK_087012)   | LP: CGATTTGTTACCCATGGTTTG                     | RP: CCTTGCTCGATTTTGTACG          | (Sparks et al., 2016)  |
|                                  | LB: ATTTTGCCGATTTTCGGAAC                      |                                  |                        |
| <i>pij7-1</i>                    | LP: CCGTTCATGGTCTAGGCG                        | RP: CATCCTCTGGTTTATCCTATCACGCCG  | (Leivar et al., 2008b) |
|                                  | LB:<br>TGATAGTGACCTTAGGCGACTTTTGAACGC         |                                  |                        |
| <i>ahl-3</i><br>(SALK_113353)    | LP: CGCTCGATTATTCATCTCGAG                     | RP: CACTCTATATCATTGCCCCG         |                        |
|                                  | LB: ATTTTGCCGATTTTCGGAAC                      |                                  |                        |
| <i>ath1-4</i>                    | ATH1int-F: CCGAGTTAGATCCACAGTTACA             | ATH1int-R: CATTTCCGCATACATCTCTTC | 2                      |

1: WT (A + B = 248bp, A + D = 784bp, C + D = 132bp); *pij3-7* (A + B = no band, A + D = no band, C + D = 132bp)

2: *ath1-4* is an EMS mutant (TGG-> TGA, CDS nt1170). The ATH1int-F and ATH1int-R primers generate PCR amplicons of 905 bp containing the *ath1-4* SNP. In wild-type plants, BseGI results in two fragments (259 and 648 bp) of the amplicon while the *ath1-4* mutant remains uncut.

1357

1358

1359

1360

1361 **Supplemental figures**

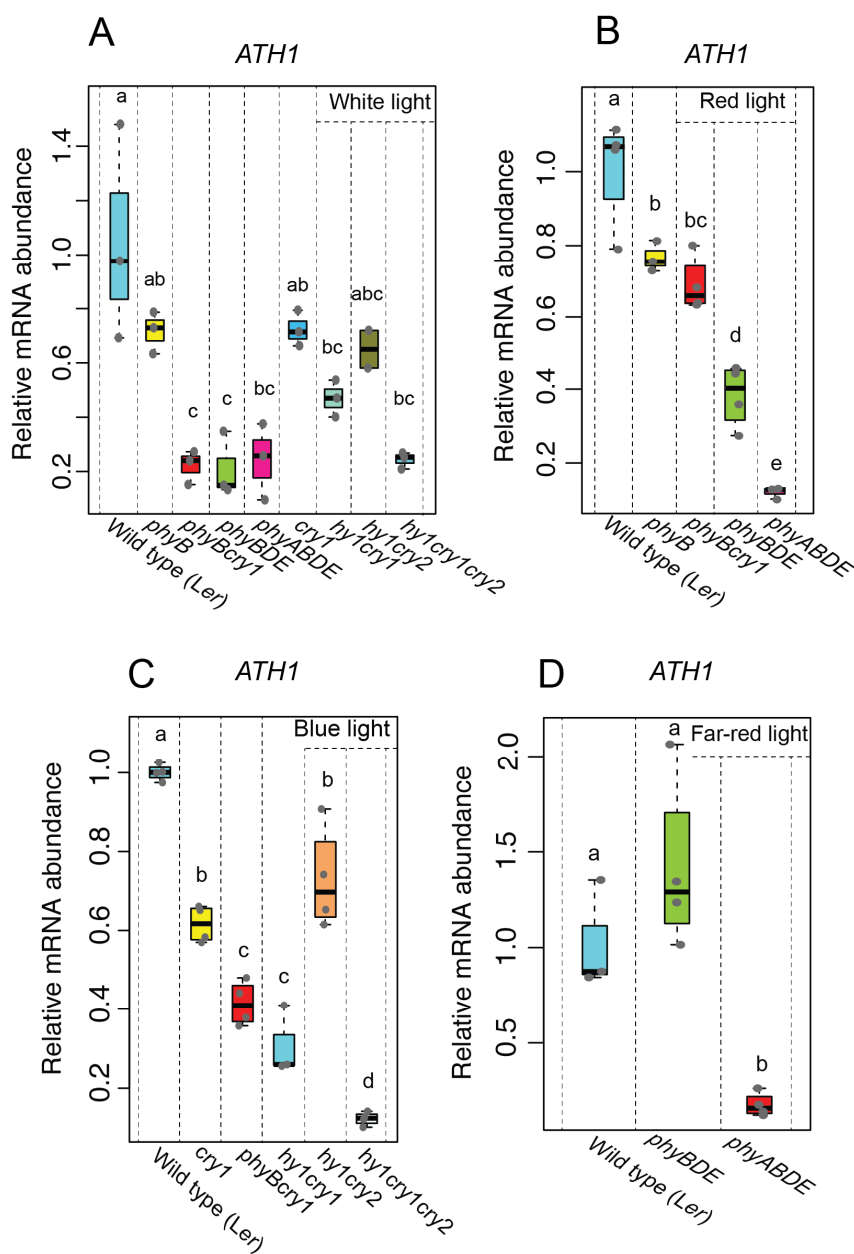

1362

1363

1364 **Figure S1: Relative mRNA abundance of *ATH1* in different photoreceptor mutants**

1365 **A-D:** Relative expression of *ATH1* in seven-day-old wild type (*Ler*) and indicated photoreceptor  
 1366 mutants grown under SD conditions in the presence of white light (**A**), red light (**B**), blue light (**C**)  
 1367 or far-red light (**D**). Transcript levels were normalized to *GAPC2* (AT1G13440) (BL) or *MUSE3*  
 1368 (AT5G15400; WL, RL, and FRL). Data shown are the average of three biological replicates. At  
 1369 least 30 seedlings were used for each biological replicate. Different letters denote statistically  
 1370 significant differences between groups ( $p < 0.05$ ) as determined by 1-way ANOVA followed by  
 1371 Tukey's post hoc test.

1372

1373

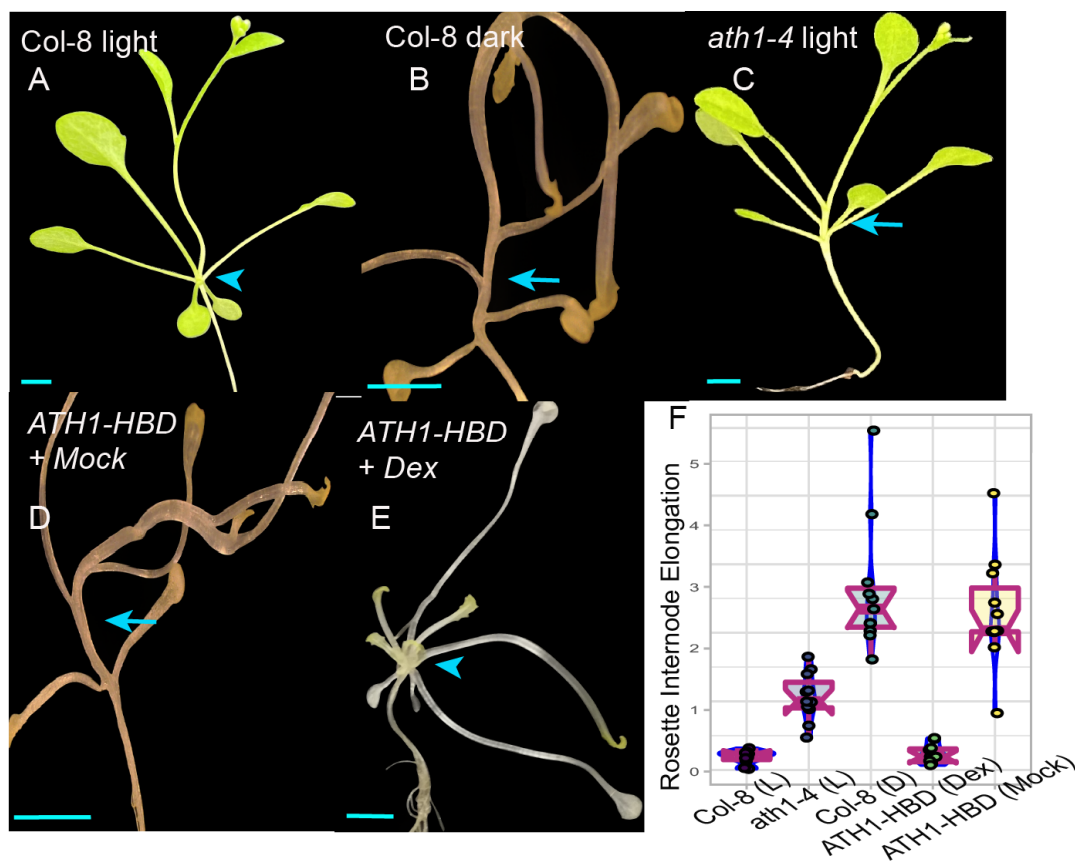

1374

1375

1376 **Figure S2: Sugar-induced dark-grown seedlings phenocopy light-grown *ath1* mutants**

1377 Rosette elongation phenotypes of wild-type Col-8 (A and B) *ath1-4* (C), and *35Spro:ATH1-HBD*  
1378 (*ATH1-HBD*; D and E) plants grown in the presence (A, C) or absence (B, D, E) of light at 27°C.  
1379 *35Spro:ATH1-HBD* plants were treated either with a mock (0.1% ethanol, D) or 10 μM  
1380 dexamethasone (Dex, E). Dark-grown plants (B, D, E) were supplemented with sucrose to a final  
1381 concentration of one percent three days after the start of the experiment. Arrows indicate elongated  
1382 rosette internodes, arrowheads indicate complete suppression of internode elongation. F: Average  
1383 rosette internode lengths of plants depicted in A-E. Per genotype and treatment 10 individual plants  
1384 were analyzed. Scale bars represent 5 mm.

1385

1386

1387

1388

1389

1390

1391

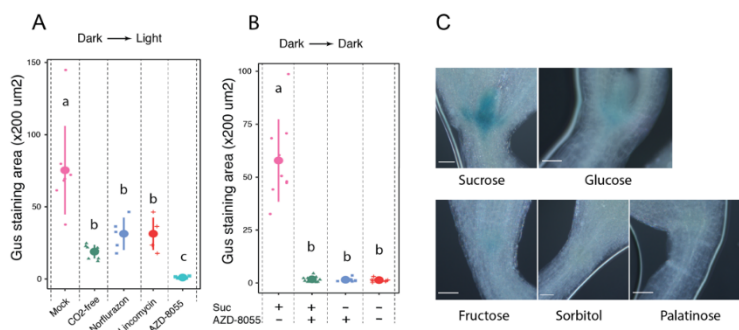

1392

1393

1394 **Figure S3: *ATH1<sub>pro</sub>:GUS* activity in seven-day-old seedlings grown in darkness in the**  
1395 **presence of different sugars**

1396 **A, B:** Quantification of GUS-staining intensity in *ATH1<sub>pro</sub>:GUS* shoot apices from **Figure 5B, E**.  
1397 Different letters denote statistically significant differences between groups ( $p < 0.05$ ) as  
1398 determined by 1-way ANOVA followed by Tukey's post hoc test.

1399 **C:** Shoot apices of GUS-stained *ATH1<sub>pro</sub>:GUS* seedlings grown in continuous darkness for seven  
1400 days. Plants were grown in the presence of either sucrose, glucose, fructose, palatinose, or sorbitol,  
1401 all added to the growth medium to a final concentration of one percent at the start of the  
1402 experiment. Scale bars represent 0.05 mm.

1403

1404

1405

1406

1407

1408

1409

1410

1411

1412

1413

1414

1415

1416

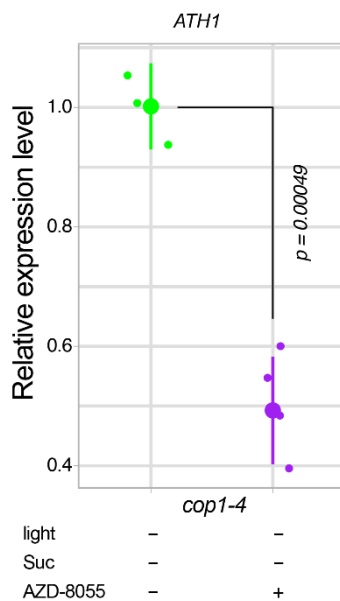

1417

1418

1419 **Figure S4: Effect of TOR inhibition on *ATH1* expression in *cop1-4* mutant seedlings.**

1420 Relative expression of *ATH1* in seven-day-old *cop1-4* mutants grown according to the  
1421 experimental setup indicated in **Figure 5A**. Seeds were light-treated for 45 minutes to stimulate  
1422 germination and then grown in continuous darkness for five days. Following the addition of AZD-  
1423 8055, the seedlings were grown for two more days in darkness before samples were taken.  
1424 Transcript levels were normalized to *MUSE3* (AT5G15400). The average of three (AZD-8055 -)  
1425 or four (AZD-8055 +) biological replicates is shown. At least 30 seedlings were used for each  
1426 biological replicate. The p-value of significant difference, as determined by the two-tailed  
1427 Student's t-test, is indicated in the figure.
